# Supplementary material for: RETRACTED: Influence of S1PR3 expression on the glioma microenvironment and prognostic significance in low-grade gliomas
Source: Research Square preprint supplement (doi:10.21203/rs.3.rs-1251483/v1), 2022-01-18
Supplement: Supplementary file 1 [file dcdf7a60e6a4f23654f4e87f.xlsx]

## Sheet: S1
Table-S1: The gene sets used in our work for marking each typical biological processes
Angiogenesis	Antigen processing machinery	CD8 T effector	Cell cycle	DNA damage repair	DNA replication	EMT (1)	EMT2	EMT3	FGFR3-related genees	Immune checkpoint	Mismatch repair	Nucleotide excision repair	Pan-F-TBRS	WNT target
CDH5	B2M	CD8A	ABL1	ALKBH2	DNA2	CLDN3	AXL	FOXF1	FGFR3	CD274	EXO1	CCNH	ACTA2	EFNB3
SOX17	HLA-A	CXCL10	ANAPC1	ALKBH3	FEN1	CLDN7	FAP	GATA6	TP63	CTLA4	LIG1	CDK7	ACTG2	MYC
SOX18	HLA-B	CXCL9	ANAPC10	APEX1	LIG1	CLDN4	LOXL2	SOX9	WNT7B	HAVCR2	MLH1	CETN2	ADAM12	TCF12
TEK	HLA-C	GZMA	ANAPC11	APEX2	MCM2	CDH1	ROR2	TWIST1		LAG3	MLH3	CUL4A	ADAM19	VEGFA
	TAP1	GZMB	ANAPC13	APLF	MCM3	VIM	TAGLN	ZEB1		PDCD1	MSH2	CUL4B	CNN1
	TAP2	IFNG	ANAPC2	ATM	MCM4	TWIST1	TWIST2	ZEB2		PDCD1LG2	MSH3	DDB1	COL4A1
		PRF1	ANAPC4	ATR	MCM5	ZEB1	WNT5A			TIGIT	MSH6	DDB2	CTGF
		TBX21	ANAPC5	ATRIP	MCM6	ZEB2					PCNA	ERCC1	CTPS1
			ANAPC7	BLM	MCM7						PMS2	ERCC2	FAM101B
			ATM	BRCA1	PCNA						POLD1	ERCC3	FSTL3
			ATR	BRCA2	POLA1						POLD2	ERCC4	HSPB1
			BUB1	BRIP1	POLA2						POLD3	ERCC5	IGFBP3
			BUB1B	CCNH	POLD1						POLD4	ERCC6	PXDC1
			BUB3	CDK7	POLD2						RFC1	ERCC8	SEMA7A
			CCNA1	CETN2	POLD3						RFC2	GTF2H1	SH3PXD2A
			CCNA2	CHAF1A	POLD4						RFC3	GTF2H2	TAGLN
			CCNB1	CHEK1	POLE						RFC4	GTF2H3	TGFBI
			CCNB2	CHEK2	POLE2						RFC5	GTF2H4	TNS1
			CCNB3	CLK2	POLE3						RPA1	GTF2H5	TPM1
			CCND1	DCLRE1C	POLE4						RPA2	LIG1
			CCND2	DDB1	PRIM1						RPA3	MNAT1
			CCND3	DDB2	PRIM2						RPA4	PCNA
			CCNE1	DUT	RFC1						SSBP1	POLD1
			CCNE2	ENDOV	RFC2							POLD2
			CCNH	ERCC1	RFC3							POLD3
			CDC14A	ERCC2	RFC4							POLD4
			CDC14B	ERCC3	RFC5							POLE
			CDC16	ERCC4	RNASEH1							POLE2
			CDC20	ERCC5	RNASEH2A							POLE3
			CDC23	ERCC6	RNASEH2B							POLE4
			CDC25A	ERCC8	RNASEH2C							RAD23A
			CDC25B	FAN1	RPA1							RAD23B
			CDC25C	FANCA	RPA2							RBX1
			CDC26	FANCB	RPA3							RFC1
			CDC27	FANCC	RPA4							RFC2
			CDC45	FANCD2	SSBP1							RFC3
			CDC6	FANCE								RFC4
			CDC7	FANCF								RFC5
			CDK1	FANCG								RPA1
			CDK2	FANCL								RPA2
			CDK4	FANCM								RPA3
			CDK6	GTF2H1								RPA4
			CDK7	GTF2H2								XPA
			CDKN1A	GTF2H3								XPC
			CDKN1B	GTF2H4
			CDKN1C	GTF2H5
			CDKN2A	H2AFX
			CDKN2B	HLTF
			CDKN2C	HUS1
			CDKN2D	LIG1
			CHEK1	LIG3
			CHEK2	LIG4
			CREBBP	MBD4
			CUL1	MDC1
			DBF4	MGMT
			E2F1	MLH1
			E2F2	MLH3
			E2F3	MMS19
			E2F4	MNAT1
			E2F5	MPG
			EP300	MSH2
			ESPL1	MSH3
			FZR1	MSH4
			GADD45A	MSH5
			GADD45B	MSH6
			GADD45G	MUTYH
			GSK3B	NEIL1
			HDAC1	NEIL2
			HDAC2	NEIL3
			MAD1L1	NHEJ1
			MAD2L1	NTHL1
			MAD2L2	NUDT1
			MCM2	OGG1
			MCM3	PALB2
			MCM4	PARP1
			MCM5	PARP2
			MCM6	PARP3
			MCM7	PCNA
			MDM2	PER1
			MYC	PMS1
			ORC1	PMS2
			ORC2	PNKP
			ORC3	POLB
			ORC4	POLD1
			ORC5	POLE
			ORC6	POLG
			PCNA	POLH
			PKMYT1	POLL
			PLK1	POLM
			PRKDC	POLQ
			PTTG1	PRKDC
			PTTG2	RAD1
			RAD21	RAD17
			RB1	RAD18
			RBL1	RAD23A
			RBL2	RAD23B
			RBX1	RAD51C
			SFN	RAD9A
			SKP1	RECQL4
			SKP2	RECQL5
			SMAD2	RIF1
			SMAD3	RNF168
			SMAD4	RNF4
			SMC1A	RNF8
			SMC1B	RPA1
			SMC3	RPA2
			STAG1	RPA3
			STAG2	RPA4
			TFDP1	RRM2B
			TFDP2	SETMAR
			TGFB1	SHPRH
			TGFB2	SMUG1
			TGFB3	TDP1
			TP53	TDP2
			TTK	TOPBP1
			WEE1	TP53
			YWHAB	TREX1
			YWHAE	UBE2A
			YWHAG	UBE2B
			YWHAH	UBE2N
			YWHAQ	UBE2V2
			YWHAZ	UNG
			ZBTB17	UVSSA
				WRN
				XAB2
				XPA
				XPC
				XRCC1
				XRCC4
				XRCC5
				XRCC6

## Sheet: S2
Table-S2: The gene sets used in our work for marking 10 oncogenic pathways
Cell Cycle	HIPPO	MYC	NOTCH	NRF2	PI3K	TGF-Beta	RTK RAS	TP53	WNT
CDKN1A	STK4	MAX	ARRDC1	NFE2L2	EIF4EBP1	TGFBR1	SPRED1	TP53	CHD8
CDKN1B	STK3	MGA	CNTN6	KEAP1	AKT1	TGFBR2	SPRED2	MDM2	LEF1
CDKN2A	SAV1	MLX	CREBBP	CUL3	AKT2	ACVR2A	SPRED3	MDM4	LGR4
CDKN2B	LATS1	MLXIP	EP300		AKT3	ACVR1B	DAB2IP	ATM	LGR5
CDKN2C	LATS2	MLXIPL	HES1		AKT1S1	SMAD2	SHOC2	CHEK2	LRP5
CCND1	MOB1A	MNT	HES2		DEPDC5	SMAD3	PPP1CA	RPS6KA3	LRP6
CCND2	MOB1B	MXD1	HES3		DEPTOR	SMAD4	SCRIB		LZTR1
CCND3	YAP1	MXD3	HES4		INPP4B		PIN1		NDP
CCNE1	WWTR1	MXD4	HES5		MAPKAP1		KSR1		PORCN
CDK2	TEAD1	MXI1	HEY1		MLST8		KSR2		RSPO1
CDK4	TEAD2	MYC	HEY2		MTOR		PEBP1		SFRP1
CDK6	TEAD3	MYCL	HEYL		NPRL2		ERF		SFRP2
RB1	TEAD4	MYCN	KAT2B		NPRL3		PEA15		SFRP4
E2F1	PTPN14		KDM5A		PDK1		JAK2		SFRP5
E2F3	NF2		NOTCH1		PIK3CA		IRS2		SOST
	WWC1		NOTCH2		PIK3CB				TCF7L1
	TAOK1		NOTCH3		PIK3R1				TLE1
	TAOK2		NOTCH4		PIK3R2				TLE2
	TAOK3		NOV		PIK3R3				TLE3
	CRB1		NRARP		PPP2R1A				TLE4
	CRB2		PSEN2		PTEN				WIF1
	CRB3		LFNG		RHEB				ZNRF3
	LLGL1		ITCH		RICTOR				CTNNB1
	LLGL2		NCSTN		RPTOR				DVL1
	HMCN1		SPEN		RPS6				DVL2
	SCRIB		JAG1		RPS6KB1				DVL3
	HIPK2		APH1A		STK11				FRAT1
	FAT1		FBXW7		TSC1				FRAT2
	FAT2		FHL1		TSC2				FZD1
	FAT3		THBS2						FZD10
	FAT4		HDAC2						FZD2
	DCHS1		MFAP2						FZD3
	DCHS2		CUL1						FZD4
	CSNK1E		RFNG						FZD5
	CSNK1D		NCOR1						FZD6
	AJUBA		NCOR2						FZD7
	LIMD1		MFAP5						FZD8
	WTIP		HDAC1						FZD9
			NUMB						WNT1
			JAG2						WNT10A
			MAML3						WNT10B
			MFNG						WNT11
			CIR1						WNT16
			CNTN1						WNT2
			MAML1						WNT3A
			MAML2						WNT4
			NUMBL						WNT5A
			PSEN1						WNT5B
			PSENEN						WNT6
			RBPJ						WNT7A
			RBPJL						WNT7B
			RBX1						WNT8A
			SAP30						WNT8B
			SKP1						WNT9A
			SNW1						WNT9B
			CTBP1						AMER1
			CTBP2						APC
			ADAM10						AXIN1
			APH1B						AXIN2
			ADAM17						DKK1
			DLK1						DKK2
			DLL1						DKK3
			DLL3						DKK4
			DLL4						GSK3B
			DNER						RNF43
			DTX1						TCF7
			DTX2						TCF7L2
			DTX3						CHD4
			DTX3L
			DTX4
			EGFL7

## Sheet: S3
Table-S3: S1PR3 related genes
symbol	correlation	pvalue
TNFRSF4	0.206579	1.65235e-06
THAP3	0.184466	1.96023e-05
PRDM16	0.262394	8.87157e-10
PRKCZ	-0.259823	1.30908e-09
ACAP3	-0.208157	1.3702e-06
PUSL1	0.352494	6.38196e-17
PEX10	0.390826	9.46518e-21
CPTP	0.267842	3.83657e-10
SKI	0.487825	5.61233e-33
MEGF6	0.114367	0.00846668
TAS1R3	0.275817	1.0865e-10
ERRFI1	0.25054	5.15082e-09
PEX14	0.302121	1.25748e-12
PLCH2	-0.247521	7.94949e-09
DNAJC11	0.265674	5.36816e-10
SPSB1	0.286553	1.86169e-11
LZIC	0.506816	7.2512e-36
SLC2A5	0.450623	8.11494e-28
MTHFR	0.408733	1.01576e-22
KCNAB2	-0.187413	1.43264e-05
ENO1	0.370828	1.08988e-18
PLEKHM2	0.224417	1.82771e-07
B3GALT6	0.196664	5.1853e-06
DHRS3	0.520612	4.41658e-38
CA6	0.217767	4.24531e-07
LRRC38	-0.163829	0.000153863
NMNAT1	0.554265	6.21987e-44
PHF13	0.499686	9.25251e-35
CCDC27	0.192169	8.54748e-06
CHD5	-0.248505	6.90486e-09
VAMP3	0.61895	2.94893e-57
DISP3	-0.183132	2.25546e-05
MMEL1	0.542791	7.30255e-42
AGTRAP	0.605936	2.5012e-54
SCNN1D	-0.256946	2.01298e-09
PIK3CD	0.473268	6.98344e-31
TMEM51	0.405711	2.22598e-22
C1orf127	0.190685	1.0056e-05
FBXO42	0.449937	9.97005e-28
ALDH4A1	0.435521	6.75534e-26
RERE	0.246256	9.51736e-09
CLCN6	0.126076	0.0036785
TTC34	0.313263	1.65051e-13
CELA2A	0.134862	0.00187916
CELA2B	0.0908848	0.0366419
SPEN	0.33622	1.90615e-15
AURKAIP1	0.114566	0.00835255
RER1	0.584515	8.59913e-50
PANK4	0.0990342	0.0227265
WRAP73	0.311131	2.45084e-13
EMC1	0.429843	3.36496e-25
VPS13D	0.279384	6.09759e-11
HTR6	-0.351234	8.3609e-17
SPATA21	0.163427	0.000159791
GPR157	0.391825	7.40205e-21
ZBTB40	0.405899	2.12055e-22
MICOS10-NBL1	0.0925619	0.0332991
FBXO44	-0.0978519	0.0244062
PRDM2	0.258895	1.50473e-09
NPHP4	0.356015	2.98078e-17
ASAP3	0.578244	1.58374e-48
TMEM201	0.267421	4.09596e-10
MTOR	0.429719	3.48438e-25
TP73	0.14233	0.00102861
MYOM3	0.352135	6.89351e-17
ANGPTL7	0.117446	0.00684637
HES5	-0.244051	1.29973e-08
PARK7	0.247544	7.92335e-09
IL22RA1	0.219799	3.29086e-07
IFNLR1	0.547582	1.02094e-42
LIN28A	-0.229123	9.90714e-08
CLIC4	0.668706	7.72518e-70
LUZP1	0.333551	3.26565e-15
GPR3	0.0890326	0.0406607
KDF1	-0.118118	0.00653193
CD164L2	-0.16895	9.43146e-05
SZRD1	0.601828	1.97138e-53
PDIK1L	0.333197	3.50608e-15
NECAP2	0.642796	5.38698e-63
SRRM1	0.424599	1.44349e-24
AKR7A3	0.0911017	0.0361942
FBXO6	0.171729	7.18894e-05
LACTBL1	0.11047	0.0110032
CNR2	0.237701	3.13569e-08
NUDC	0.121531	0.00512626
TEX46	0.150289	0.000524003
GPN2	0.437776	3.53933e-26
PNRC2	0.52939	1.51974e-39
LAPTM5	0.608982	5.3082e-55
PHACTR4	0.578701	1.28342e-48
CNKSR1	-0.119708	0.00583907
ICMT	0.558064	1.23258e-44
WASF2	0.684599	2.17134e-74
MED18	0.399174	1.18292e-21
ZDHHC18	0.43371	1.13109e-25
SLC9A1	0.281196	4.53188e-11
LDLRAP1	0.184318	1.99113e-05
TENT5B	0.308366	4.0724e-13
HMGCL	0.520239	5.08548e-38
SDC3	0.213091	7.55911e-07
GPATCH3	0.237266	3.32729e-08
PAFAH2	0.58299	1.75645e-49
SRSF10	0.465394	8.62951e-30
WDTC1	0.435107	7.60113e-26
DHDDS	0.474062	5.39972e-31
SFN	0.284688	2.5431e-11
DNAJC8	0.480917	5.70009e-32
SESN2	0.24752	7.95059e-09
SERINC2	0.360996	9.98762e-18
PTAFR	0.554175	6.46236e-44
RPS6KA1	0.58249	2.21813e-49
HMGN2	0.439534	2.13135e-26
NKAIN1	-0.208065	1.38536e-06
SNRNP40	0.505876	1.01796e-35
SLC25A33	0.217616	4.32584e-07
FBLIM1	0.358079	1.89936e-17
DNAJC16	0.454058	2.87712e-28
SYTL1	0.117268	0.0069317
EYA3	0.503787	2.15438e-35
ZNF593	0.194945	6.28598e-06
PIGV	0.514812	3.87988e-37
C1orf158	0.349763	1.14444e-16
KLHL21	0.418656	7.29313e-24
EPHA2	0.370633	1.13985e-18
ARHGEF19	0.249862	5.68099e-09
DRAXIN	0.332808	3.78994e-15
MAP3K6	0.406218	1.95253e-22
TNFRSF1B	0.636322	2.18484e-61
KIAA0319L	0.401737	6.17159e-22
UBE4B	0.29112	8.58872e-12
PLA2G5	0.159024	0.000240384
ZMYM6	0.381115	9.88109e-20
AGO4	0.334454	2.72322e-15
CDCA8	0.365989	3.27386e-18
CPLANE2	0.105143	0.0155512
RPL22	0.105756	0.0149548
RNF207	-0.147994	0.000638688
TRIT1	0.322474	2.88406e-14
MATN1	0.11218	0.00981754
TAS1R2	0.210385	1.04928e-06
EXTL1	-0.225223	1.64719e-07
CASZ1	0.353474	5.16875e-17
AGMAT	0.28071	4.9084e-11
FAAP20	0.236521	3.68293e-08
DNALI1	0.626771	4.38948e-59
EDN2	0.183422	2.18792e-05
SCMH1	0.448134	1.70789e-27
IFFO2	0.301279	1.46105e-12
RRAGC	0.564706	6.91154e-46
KCNQ4	0.212311	8.31254e-07
GRIK3	0.212213	8.41222e-07
PLA2G2D	0.192875	7.90802e-06
YRDC	0.3519	7.25081e-17
TRNP1	-0.114242	0.00853938
CITED4	0.341255	6.80761e-16
FBXO2	-0.113283	0.00911391
RCC2	0.463026	1.81497e-29
MRTO4	0.298347	2.45346e-12
PSMB2	0.46729	4.73885e-30
NFYC	0.396866	2.11468e-21
CASP9	0.131051	0.00252716
DDI2	0.320753	4.01387e-14
AGO1	0.406453	1.83732e-22
THRAP3	0.546448	1.63084e-42
RIMKLA	-0.155581	0.000328411
PADI6	0.211801	8.8429e-07
C1orf122	0.266335	4.84694e-10
EPHA10	-0.428858	4.43179e-25
FHL3	0.573793	1.20515e-47
RHBDL2	0.135716	0.00175661
TMEM35B	0.658936	3.53408e-67
INPP5B	0.488866	3.93946e-33
FAM183A	0.440178	1.76881e-26
C1orf94	0.262815	8.32069e-10
ZMYM4	0.453485	3.42351e-28
UTP11	0.449812	1.03482e-27
USP48	0.426483	8.58028e-25
POMGNT1	0.399158	1.18749e-21
PPCS	0.481864	4.1607e-32
IPP	0.512246	1.00135e-36
RLF	0.443435	6.84479e-27
CLSPN	0.2871	1.69825e-11
GNL2	0.553402	8.95937e-44
GJA4	0.215066	5.93372e-07
MORN1	0.339458	9.85213e-16
MYCBP	0.66347	2.11984e-68
MICOS10	0.219881	3.25687e-07
DLGAP3	-0.352643	6.18058e-17
FOXO6	-0.114434	0.00842808
ECHDC2	0.249316	6.14625e-09
SMIM12	0.337291	1.53373e-15
TNFRSF9	0.369296	1.54707e-18
CTPS1	0.297742	2.72857e-12
TMEM61	0.300804	1.58959e-12
TMEM269	0.14528	0.00080427
ERI3	0.281598	4.24184e-11
CZIB	0.374434	4.74376e-19
FAM151A	0.0995552	0.0220187
OSBPL9	0.524372	1.05539e-38
C1orf210	0.192697	8.06499e-06
SLC66A1	0.4374	3.94395e-26
PARS2	0.437782	3.53328e-26
ZYG11A	0.321951	3.18943e-14
ARID1A	0.47208	1.02463e-30
SVBP	0.488368	4.66626e-33
ZYG11B	0.247018	8.54071e-09
NFIA	0.468429	3.29969e-30
L1TD1	0.155251	0.000338262
TXNDC12	0.619463	2.24581e-57
ALPL	-0.150738	0.000503912
SF3A3	0.511968	1.10891e-36
TTC4	0.420746	4.1415e-24
BMP8B	0.398208	1.5094e-21
CYP2J2	0.125981	0.0037045
KLF17	0.332838	3.76701e-15
PLPP3	0.385764	3.24638e-20
SNIP1	0.536495	9.23649e-41
CPT2	0.551345	2.12896e-43
FOXJ3	0.444519	4.97855e-27
TUT4	0.446628	2.67152e-27
RAVER2	0.352109	6.93175e-17
TACSTD2	0.189291	1.17009e-05
FOXD3	0.364161	4.93658e-18
CCDC30	0.49561	3.8622e-34
DIRAS3	0.491898	1.39571e-33
LURAP1	0.195644	5.81415e-06
MAGOH	0.454051	2.88365e-28
MAST2	0.299167	2.12374e-12
TSPAN1	0.264486	6.44485e-10
CDKN2C	0.250476	5.19865e-09
CAPZB	0.562921	1.5084e-45
C1orf87	0.513283	6.83065e-37
ZSWIM5	0.0994133	0.0222096
ROR1	0.397287	1.90245e-21
OMA1	0.4599	4.79953e-29
SLC35D1	0.514861	3.80946e-37
LRP8	-0.134364	0.00195418
TCEANC2	0.523297	1.59193e-38
KTI12	0.397297	1.89785e-21
LRRC42	0.55994	5.49747e-45
WLS	0.688689	1.31188e-75
DNAJB4	0.459629	5.21951e-29
USP1	0.494311	6.06575e-34
AK5	-0.181556	2.65879e-05
SPATA6	0.476456	2.47641e-31
GIPC2	0.256362	2.19559e-09
RPE65	0.487095	7.18871e-33
ANGPTL3	0.32002	4.61732e-14
GNG12	0.659987	1.84926e-67
DNAJC6	-0.0955388	0.0280046
AK4	0.272716	1.78308e-10
LEPROT	0.598785	8.92802e-53
RAD54L	0.299498	2.00305e-12
CACHD1	0.498964	1.19346e-34
EFCAB7	0.37239	7.61152e-19
MCOLN2	0.31221	2.00711e-13
CYP4A11	-0.206763	1.61688e-06
ATG4C	0.478373	1.32051e-31
ASB17	0.124394	0.0041644
ADGRL4	0.362847	6.61977e-18
GJA9	0.231894	6.86537e-08
HS2ST1	0.596455	2.80647e-52
GNG5	0.619346	2.39023e-57
PPIE	0.385172	3.74416e-20
MIGA1	0.136941	0.00159355
CLCA1	0.2514	4.54747e-09
MTF1	0.571165	3.93839e-47
CTBS	0.662136	4.87496e-68
JAK1	0.517925	1.2147e-37
TTLL7	0.130676	0.00260079
GADD45A	0.431604	2.05148e-25
SLC44A5	0.246051	9.79945e-09
KDM4A	0.448792	1.40372e-27
ZNHIT6	0.530275	1.07621e-39
MROH7	0.0930485	0.0323793
PTGFR	-0.199598	3.71849e-06
LMO4	0.204828	2.0305e-06
PRPF38A	0.418469	7.67078e-24
SYDE2	0.172007	6.99459e-05
PIGK	0.512162	1.0327e-36
ST6GALNAC3	0.295784	3.84174e-12
NDC1	0.490826	2.01677e-33
USP24	0.381909	8.18075e-20
DOCK7	0.646508	6.19026e-64
NEGR1	-0.22168	2.59386e-07
FAF1	0.340973	7.21486e-16
FAAH	-0.296856	3.18672e-12
KYAT3	0.409985	7.32047e-23
SHISAL2A	0.458899	6.54081e-29
DNTTIP2	0.454279	2.69036e-28
ODF2L	0.34139	6.62066e-16
PTPRF	0.442232	9.732e-27
BSND	0.113514	0.00897286
GPX7	0.52616	5.31166e-39
SLC44A3	0.420434	4.50712e-24
PKN2	0.563085	1.40477e-45
TMED5	0.640281	2.29363e-62
SLFNL1	0.373623	5.7252e-19
ABCD3	0.538068	4.92368e-41
MROH7-TTC4	0.110087	0.0112863
ZMYND12	0.372561	7.31717e-19
ALG14	0.514175	4.91186e-37
ZZZ3	0.50369	2.2308e-35
YIPF1	0.417024	1.13163e-23
GJB4	0.110673	0.0108566
DMRTA2	0.269855	2.80091e-10
HIVEP3	0.390656	9.86957e-21
SH3GLB1	0.664307	1.2539e-68
TM2D1	0.434079	1.01847e-25
SCP2	0.605958	2.47393e-54
HOOK1	-0.148293	0.000622546
BCAR3	0.310143	2.93994e-13
BARHL2	0.189848	1.1015e-05
DMAP1	0.143841	0.000907362
AHCYL1	0.316823	8.47078e-14
CNN3	0.689726	6.39409e-76
VAV3	0.312854	1.78103e-13
DPYD	0.577226	2.52555e-48
LRRC8D	0.468956	2.78912e-30
S1PR1	0.287562	1.57101e-11
MCOLN3	0.275614	1.12247e-10
ARHGAP29	0.376613	2.85556e-19
ABCA4	0.151867	0.000456547
PGM1	0.247956	7.47045e-09
IGSF21	-0.306227	6.01051e-13
COA7	0.212247	8.37674e-07
MAD2L2	0.305713	6.59575e-13
OLFML3	0.639646	3.30103e-62
TRABD2B	0.344021	3.83588e-16
GCLM	0.513108	7.28784e-37
RPF1	0.548345	7.4406e-43
TGFBR3	0.392899	5.67889e-21
PIK3R3	0.304487	8.2301e-13
SZT2	0.460621	3.83861e-29
PHTF1	0.499998	8.28576e-35
WDR77	0.54621	1.79886e-42
GSTM2	0.193233	7.60187e-06
F3	0.423871	1.76376e-24
PALMD	0.483459	2.44368e-32
VCAM1	0.616254	1.22361e-56
HIPK1	0.552123	1.53582e-43
PSRC1	0.389475	1.31785e-20
GPR88	0.243991	1.31086e-08
RWDD3	0.289234	1.1842e-11
MAN1A2	0.365014	4.07667e-18
SRGAP2B	0.280501	5.07956e-11
LPAR3	0.101261	0.0198337
DPH5	0.392105	6.90893e-21
CTTNBP2NL	0.618896	3.03461e-57
SORT1	0.385602	3.3758e-20
NOTCH2	0.478477	1.2762e-31
DNAI3	0.414593	2.16696e-23
STRIP1	0.279916	5.58959e-11
SLC25A24	0.506394	8.44313e-36
PLPPR5	-0.262682	8.49138e-10
MYBPHL	0.131565	0.00242917
PIFO	0.565946	4.00606e-46
TSPAN2	0.253863	3.17403e-09
FAM72D	0.207485	1.48424e-06
MOV10	0.492417	1.16714e-33
LRIG2	0.348549	1.48094e-16
PSMA5	0.441787	1.10804e-26
SLC35A3	0.451727	5.82338e-28
AGL	0.414872	2.01196e-23
SLC6A17	-0.255438	2.51719e-09
HSD3B2	0.113932	0.00872122
PTPN22	0.523777	1.32532e-38
COL11A1	0.337912	1.3514e-15
RNPC3	0.143608	0.000925145
SNX7	0.579185	1.02688e-48
AP4B1	0.186782	1.53271e-05
POLR3C	0.241899	1.7566e-08
SARS1	0.226891	1.32693e-07
SLC30A7	0.63098	4.33861e-60
GSTM1	0.117005	0.00705966
SEC22B	0.593415	1.23329e-51
MYSM1	0.257486	1.85751e-09
ANKRD34A	-0.20013	3.49906e-06
PTGFRN	0.340119	8.60223e-16
BCAS2	0.404983	2.68639e-22
ZNF326	0.369177	1.58961e-18
TRIM45	0.223689	2.00688e-07
VANGL1	0.501294	5.23688e-35
HJV	-0.322529	2.85385e-14
TMIGD3	0.51235	9.63494e-37
TENT5C	0.458314	7.83171e-29
PDZK1	0.314954	1.20357e-13
VPS45	0.235094	4.46925e-08
RNF115	0.181099	2.78822e-05
PIP5K1A	0.31154	2.27243e-13
GDAP2	0.517164	1.61519e-37
PRPF3	-0.140247	0.00122052
GBP5	0.626594	4.83636e-59
DCLRE1B	0.562105	2.1518e-45
NBPF9	0.186306	1.61262e-05
CAPZA1	0.649348	1.15841e-64
PPM1J	0.211057	9.67639e-07
C1orf54	0.429781	3.42381e-25
WDR3	0.418412	7.78981e-24
PLEKHO1	0.240191	2.22638e-08
CHD1L	0.259746	1.32434e-09
SCNM1	0.0992516	0.0224289
FLG	0.162718	0.000170768
PSMB4	0.259892	1.29557e-09
PPIAL4H	-0.120394	0.00556085
ALX3	0.204872	2.02024e-06
NHLH2	0.147592	0.000661034
TRIM33	0.345396	2.87778e-16
PDE4DIP	0.195236	6.08498e-06
CDC14A	0.556215	2.71697e-44
CD53	0.613244	5.89353e-56
APH1A	0.419167	6.35268e-24
ZBTB7B	0.537873	5.32424e-41
FLG2	0.13224	0.00230589
SRGAP2C	0.439883	1.92668e-26
SPAG17	0.371901	8.51938e-19
CIART	-0.100983	0.0201759
ZNF687	0.11474	0.00825371
TTF2	0.510301	2.04312e-36
CKS1B	0.203045	2.50007e-06
MAGI3	0.317535	7.40424e-14
RAP1A	0.591817	2.66859e-51
OVGP1	0.114485	0.00839909
S100A7L2	-0.0943471	0.0300303
UBL4B	0.323557	2.34023e-14
SLC27A3	0.142917	0.00097981
CA14	-0.0909128	0.0365838
CD5L	0.232308	6.49659e-08
S100A8	0.356362	2.76413e-17
SELENBP1	0.0889326	0.040888
FMO5	0.217714	4.27337e-07
GSTM3	0.104871	0.0158221
S100A9	0.380694	1.09211e-19
LYSMD1	-0.110998	0.0106242
KCNN3	0.261093	1.08068e-09
FLAD1	0.193962	7.01201e-06
ATP5PB	0.472468	9.04338e-31
PMVK	-0.237022	3.44001e-08
VANGL2	0.245457	1.06592e-08
DENND2C	0.202305	2.72422e-06
ITGA10	0.189274	1.17232e-05
TPM3	0.493961	6.84666e-34
CD2	0.483948	2.0747e-32
ALG6	0.357126	2.33944e-17
DEPDC1	0.330536	5.96109e-15
NBPF26	0.416921	1.16329e-23
NBPF20	0.120545	0.00550156
FCGR1B	0.402407	5.20243e-22
LORICRIN	-0.425203	1.22218e-24
C1orf189	0.319961	4.67012e-14
INTS3	0.233816	5.30866e-08
ETV3L	-0.120445	0.00554071
S100A12	0.20647	1.67379e-06
NBPF14	0.2013	3.05935e-06
GTF2B	0.497785	1.80582e-34
TNFSF4	0.314709	1.26016e-13
C1orf226	0.537544	6.07529e-41
MTMR11	0.466099	6.90897e-30
KCNJ9	-0.346644	2.21449e-16
CSF1	0.515145	3.42865e-37
NBPF10	0.284614	2.57448e-11
TNFAIP8L2	0.503493	2.39333e-35
UBAP2L	0.257356	1.89402e-09
IGSF8	-0.345668	2.7181e-16
TLCD4-RWDD3	0.196293	5.40624e-06
SLAMF6	0.519305	7.23352e-38
SPRR2G	-0.356251	2.83135e-17
CD160	0.440174	1.77059e-26
C1orf112	0.46798	3.80589e-30
OTUD7B	0.366228	3.10211e-18
PYHIN1	0.406498	1.81606e-22
LAMC1	0.549833	4.00705e-43
CD1D	0.295433	4.08385e-12
S100A11	0.642147	7.83967e-63
MGST3	0.100702	0.0205281
CASQ1	-0.236628	3.62984e-08
FCRL5	0.228822	1.03081e-07
NCSTN	0.456568	1.33855e-28
FASLG	0.397522	1.79355e-21
SPATA46	0.186317	1.61072e-05
ILF2	0.170953	7.75818e-05
NME7	0.419402	5.9628e-24
RCSD1	0.632463	1.90364e-60
TNR	-0.214808	6.12536e-07
SFT2D2	0.592813	1.65047e-51
UCK2	-0.0853076	0.049878
PIGM	0.235606	4.16972e-08
FAM20B	0.115513	0.00782735
XCL2	0.404184	3.2993e-22
BLZF1	0.232753	6.12219e-08
FAM163A	-0.246125	9.69631e-09
CYB5R1	0.363035	6.34894e-18
KIFAP3	0.130244	0.00268808
SPATA1	0.42672	8.03577e-25
TBX15	0.29213	7.22461e-12
CD48	0.43309	1.34845e-25
COPA	0.340775	7.51515e-16
TPR	0.298822	2.25674e-12
METTL18	0.174844	5.27519e-05
ACKR1	0.165386	0.000132796
CHIA	0.135022	0.00185554
EXTL2	0.452367	4.80072e-28
DCAF8	-0.111093	0.0105576
KIRREL1	0.312723	1.82504e-13
ANP32E	0.375833	3.42591e-19
DDX59	0.210741	1.00521e-06
NIBAN1	0.626407	5.35466e-59
F5	-0.111457	0.0103046
CHI3L1	0.380949	1.02788e-19
AGO3	0.398935	1.25631e-21
TMOD4	0.112726	0.00946356
ETV3	0.273143	1.66624e-10
LAMC2	0.106767	0.0140158
RABIF	0.126682	0.00351639
VAMP4	-0.121364	0.00518822
CD58	0.617783	5.4689e-57
RGS2	0.183865	2.08836e-05
ZNF644	0.467058	5.09973e-30
C4BPB	0.178354	3.69836e-05
GPA33	0.157218	0.000283362
XCL1	0.349835	1.12705e-16
STUM	-0.137792	0.00148863
PIAS3	0.395004	3.36794e-21
NHLH1	0.138686	0.00138524
CFH	0.480367	6.83803e-32
NUF2	0.227295	1.2588e-07
MFSD4A	-0.24473	1.18127e-08
TBX19	0.494572	5.54082e-34
PRKAA2	0.171181	7.58651e-05
NR5A2	0.403802	3.63973e-22
RGS8	-0.0882296	0.0425157
SCYL3	0.240923	2.01197e-08
DUSP10	0.396075	2.57761e-21
ANKRD35	0.28192	4.02286e-11
TUFT1	0.144281	0.000874562
DNM3	-0.298054	2.58336e-12
CHIT1	0.171734	7.18484e-05
C1orf105	0.192172	8.54508e-06
NMNAT2	-0.271059	2.31776e-10
EFCAB2	0.14775	0.000652178
TARBP1	-0.175336	5.02121e-05
TXNIP	0.189333	1.16479e-05
CREG1	0.433939	1.05993e-25
LAD1	0.0937901	0.0310193
KLHL12	0.183016	2.28306e-05
LY9	0.31417	1.39365e-13
TDRD5	-0.09693	0.0257894
ARPC5	0.534888	1.7504e-40
SCCPDH	0.197604	4.66369e-06
CEP350	0.181065	2.79801e-05
IRF6	0.290099	1.02225e-11
ELK4	0.387923	1.92421e-20
TFB2M	0.170487	8.12034e-05
LYPLAL1	0.360843	1.0333e-17
MPZL1	0.333616	3.22342e-15
CATSPERE	0.191353	9.34872e-06
PRDX6	0.494271	6.15043e-34
GGPS1	0.313752	1.50677e-13
FMO2	0.17928	3.36368e-05
CSRP1	0.132131	0.00232536
LMX1A	0.125783	0.00375933
ZNF648	0.131285	0.00248201
SELE	0.185048	1.8432e-05
GPATCH2	0.234468	4.86279e-08
RHOU	0.130384	0.00265945
TOR3A	0.362187	7.66845e-18
ADIPOR1	0.426642	8.21054e-25
FCRL3	0.24679	8.82233e-09
RNF2	0.19885	4.04911e-06
KDM5B	0.10479	0.0159045
FCRL2	0.137005	0.0015855
SPATA17	0.54731	1.14235e-42
ELF3	0.17801	3.83033e-05
PRRX1	0.357608	2.10547e-17
IVNS1ABP	0.148373	0.000618246
C8B	0.102318	0.0185761
DTL	0.15798	0.000264427
TRMT1L	0.123547	0.00443049
HSD11B1	-0.088916	0.0409258
SOAT1	0.596944	2.2078e-52
BATF3	0.448186	1.68153e-27
SOX13	0.0864951	0.0467665
NID1	0.342379	5.39528e-16
BTG2	0.230902	7.83343e-08
ENAH	0.381205	9.6729e-20
MRPS14	0.295079	4.34257e-12
SLAMF1	0.44544	3.79514e-27
SLC9C2	0.340059	8.7087e-16
NOTCH2NLA	0.266656	4.61191e-10
LHX9	0.304262	8.57016e-13
DESI2	0.340415	8.09396e-16
RRP15	0.0968343	0.0259368
MYBPH	0.43965	2.06114e-26
OR2L13	-0.188513	1.27273e-05
TMEM59	0.499351	1.04119e-34
CACYBP	-0.136818	0.00160935
PPFIA4	-0.238522	2.80188e-08
APOBEC4	0.18675	1.53794e-05
IARS2	0.296523	3.37758e-12
PTPN14	0.479702	8.52108e-32
CAPN2	0.2959	3.76481e-12
NEK2	0.177552	4.01333e-05
C1orf53	0.28813	1.42735e-11
ITLN2	0.291393	8.19668e-12
RAB4A	0.281728	4.15234e-11
TOMM20	-0.160589	0.000208158
MTRNR2L11	-0.135119	0.0018415
REN	-0.310026	3.00413e-13
OR2AK2	-0.123835	0.00433839
TP53BP2	0.277432	8.37315e-11
SYT14	-0.235211	4.39894e-08
DHX9	0.243418	1.42052e-08
BTF3L4	0.390876	9.34896e-21
SWT1	0.249805	5.72763e-09
FAM72B	0.418474	7.66175e-24
FBXO28	0.121614	0.00509588
CEP170	0.164749	0.000141059
CCDC190	0.355391	3.41407e-17
COP1	0.176008	4.69277e-05
FMOD	0.404472	3.06419e-22
TEX35	-0.102394	0.018489
SLAMF7	0.322982	2.6153e-14
RGS18	0.562125	2.13337e-45
GNPAT	0.341452	6.53552e-16
TGFB2	0.608341	7.36653e-55
NUAK2	0.508821	3.50519e-36
ODR4	0.152657	0.00042594
FMO4	0.473785	5.90768e-31
NSL1	0.276919	9.09654e-11
ATP1A4	-0.131625	0.00241802
GALNT2	0.586769	2.9713e-50
FMO1	0.187185	1.46809e-05
SPRTN	0.309746	3.16242e-13
EGLN1	0.162076	0.000181317
ZC3H11B	0.443045	7.6722e-27
FCRL1	0.217482	4.39904e-07
WNT9A	-0.19423	6.80682e-06
GNG4	-0.278742	6.76922e-11
PAPPA2	0.419372	6.01088e-24
TSNAX-DISC1	0.102528	0.0183345
LRRN2	-0.109859	0.0114568
PPP2R5A	0.0941907	0.0303052
DDR2	0.437529	3.79952e-26
CCDC181	0.358906	1.58408e-17
OPTC	-0.360012	1.2414e-17
SUCO	0.213243	7.42026e-07
ATF3	0.447085	2.33302e-27
RNASEL	0.232192	6.59828e-08
PLA2G4A	0.532107	5.24815e-40
ETNK2	0.261677	9.89218e-10
HES2	0.130493	0.00263744
TRAF3IP3	0.569218	9.40244e-47
SMG7	0.126893	0.00346169
BPNT1	0.142207	0.00103912
PROX1	0.148474	0.000612937
ESRRG	-0.184964	1.85968e-05
PFKFB2	0.303692	9.49305e-13
RAB3GAP2	0.151329	0.000478584
SELP	0.27012	2.68677e-10
PTPRC	0.666382	3.38684e-69
CAMK1G	-0.227988	1.14985e-07
ZNF672	0.149707	0.00055112
UAP1	0.267239	4.21372e-10
UHMK1	0.283839	2.92874e-11
C1orf74	0.225087	1.67645e-07
LEMD1	-0.279592	5.89427e-11
ARHGEF10L	0.370915	1.06839e-18
TSNAX	0.21737	4.4609e-07
RPS27AP5	-0.145354	0.000799269
FAM71A	0.122189	0.00488909
RNPEP	0.501834	4.32394e-35
KIAA0040	0.598319	1.12304e-52
G0S2	0.209149	1.21718e-06
EXOC8	0.136145	0.00169779
TNNT2	-0.262531	8.68819e-10
BLACAT1	-0.435211	7.37859e-26
RGS16	0.453636	3.27011e-28
RYR2	-0.186055	1.65633e-05
BRINP2	-0.173966	5.75926e-05
NEK7	0.320259	4.41167e-14
PGBD5	-0.261943	9.50158e-10
ANKRD45	0.379135	1.57927e-19
SYT2	-0.114811	0.00821359
ZNF695	-0.122547	0.00476429
RPS6KC1	0.187484	1.42176e-05
TMCC2	-0.244495	1.2211e-08
PM20D1	0.224304	1.85456e-07
ZNF670-ZNF695	0.0958266	0.0275334
NUP133	0.235096	4.46771e-08
CENPF	0.281025	4.66085e-11
RGS1	0.44403	5.74769e-27
IPO9	0.362173	7.69262e-18
PGBD2	0.238625	2.76248e-08
PRKAB2	0.0917139	0.0349554
FLVCR1	-0.107549	0.0133248
SLC41A1	0.382815	6.59147e-20
USH2A	0.124924	0.00400544
ZNF670	0.185729	1.71473e-05
ADSS2	0.270602	2.49097e-10
GPR137B	0.277224	8.66005e-11
EPRS1	0.291549	7.98139e-12
ST7L	0.482298	3.60089e-32
RBBP5	0.151887	0.000455764
CACNA1E	-0.253938	3.13948e-09
XPR1	0.448906	1.35687e-27
KIF14	0.311739	2.19e-13
STYXL2	0.225247	1.64213e-07
COLGALT2	-0.0866422	0.0463927
TNNI1	0.232106	6.67429e-08
LYPD8	-0.255763	2.39927e-09
PCNX2	-0.110894	0.0106981
EEF1AKNMT	0.213838	6.89967e-07
SDCCAG8	0.381279	9.504e-20
EDEM3	0.27736	8.47096e-11
CELSR2	0.262272	9.03756e-10
SLC35F3	-0.27497	1.2448e-10
UBR4	0.313609	1.54756e-13
ZNF281	0.170515	8.09827e-05
MAEL	0.144926	0.000828545
ARID4B	0.215384	5.70583e-07
PIGC	0.381351	9.34356e-20
WNT2B	0.437421	3.92001e-26
NUCKS1	0.139601	0.00128632
MAP3K21	0.106508	0.014251
TIMM17A	0.094647	0.029509
CDC7	0.24597	9.91175e-09
ADGRL2	0.235376	4.30156e-08
GPR52	-0.167449	0.000109022
KLHL20	0.196352	5.37007e-06
HAX1	0.109442	0.0117761
LYST	0.447417	2.11354e-27
RAB29	0.463616	1.50877e-29
C8A	0.0884822	0.0419247
KCTD3	0.327116	1.17009e-14
ZC3H12A	0.526721	4.2782e-39
PBXIP1	0.375019	4.14172e-19
SELENOF	0.631615	3.05128e-60
CD244	0.20832	1.34384e-06
RBM34	-0.145706	0.000775884
PYGO2	0.398167	1.52481e-21
KCNK1	-0.228186	1.12038e-07
TEDDM1	-0.103844	0.016884
ANGPTL1	0.142294	0.00103167
CLCA2	0.0924672	0.0334806
HNRNPU	0.264346	6.58445e-10
HMCN1	0.210428	1.04385e-06
ALDH9A1	0.239601	2.4155e-08
CAMK2N1	-0.136933	0.00159461
MUL1	0.546986	1.30645e-42
FAM43B	0.214833	6.10636e-07
CDA	0.157938	0.000265419
PINK1	0.183401	2.19284e-05
CDC73	0.389539	1.29738e-20
B3GALT2	-0.211172	9.5424e-07
LRRC40	0.421044	3.8193e-24
SRSF11	0.402337	5.29657e-22
ANKRD13C	0.376619	2.85143e-19
CTH	0.182701	2.35958e-05
E2F2	0.277674	8.05103e-11
ID3	0.461157	3.25021e-29
RPL11	0.266829	4.49009e-10
ELOA	0.494942	4.8714e-34
PITHD1	0.172553	6.62715e-05
LYPLA2	0.325275	1.67676e-14
GALE	0.326306	1.37131e-14
RGS7	-0.283632	3.03137e-11
DUSP23	0.361198	9.552e-18
FCRL6	0.460223	4.34273e-29
SLAMF8	0.485157	1.38262e-32
CFAP45	0.37068	1.12761e-18
IGSF9	0.204199	2.18577e-06
SLAMF9	0.263071	8.00202e-10
SPOCD1	0.519494	6.73537e-38
ATP1A1	0.242111	1.70537e-08
ZBTB41	0.245509	1.05813e-08
EFNA4	0.533076	3.58359e-40
EFNA3	-0.126439	0.00358059
EFNA1	0.2759	1.07202e-10
SLC50A1	0.209688	1.1411e-06
KRTCAP2	0.161206	0.000196603
TRIM46	-0.163632	0.000156732
MUC1	0.441324	1.26796e-26
THBS3	0.203395	2.40035e-06
GBA	0.190585	1.01662e-05
FAM189B	-0.137825	0.00148476
SCAMP3	0.0905708	0.0372984
CLK2	0.0870359	0.0454044
HCN3	-0.307209	5.02901e-13
PKLR	-0.120214	0.00563282
IL23R	0.159768	0.000224513
CR1L	0.232862	6.03315e-08
CD46	0.201349	3.04213e-06
CD34	0.227739	1.18789e-07
PGD	0.461858	2.61333e-29
CENPS-CORT	0.247481	7.99409e-09
CENPS	0.41937	6.01397e-24
DFFA	0.434915	8.02927e-26
LAX1	0.490458	2.2874e-33
ZBED6	0.231563	7.17488e-08
XKR8	0.370544	1.16313e-18
FAM89A	0.2978	2.70102e-12
C1orf131	0.246343	9.40101e-09
TOE1	0.423706	1.84524e-24
TESK2	0.304192	8.67879e-13
CCDC163	0.392624	6.07808e-21
MMACHC	0.196085	5.53365e-06
GCSAML	0.131028	0.00253163
NLRP3	0.502737	3.13487e-35
FAM102B	0.199783	3.64085e-06
HENMT1	0.119809	0.00579738
PRPF38B	0.511984	1.10226e-36
FNDC7	0.343938	3.90206e-16
STXBP3	0.535251	1.51547e-40
AKNAD1	0.0976187	0.0247499
TAF13	0.444518	4.98017e-27
TMEM167B	0.552332	1.40636e-43
DAP3	0.317229	7.84561e-14
RIT1	0.552686	1.21196e-43
KHDC4	0.105766	0.0149454
LAMTOR2	0.332974	3.66629e-15
RAB25	-0.117519	0.00681166
SEMA4A	-0.319461	5.13735e-14
PMF1-BGLAP	-0.105208	0.0154869
BGLAP	-0.278613	6.91335e-11
SMG5	0.292831	6.40421e-12
TMEM79	0.100481	0.0208085
GLMP	0.497842	1.77018e-34
RHBG	0.224613	1.78225e-07
CYP4X1	-0.204997	1.99078e-06
CYP4Z1	-0.26625	4.91095e-10
CYP4A22	-0.200068	3.52413e-06
PDZK1IP1	0.254448	2.91264e-09
TAL1	0.384725	4.16979e-20
FOXE3	0.178952	3.47896e-05
NCF2	0.512128	1.04576e-36
CD55	0.197098	4.93798e-06
DIO1	0.43055	2.76011e-25
VHLL	-0.0906374	0.0371583
LRRC52	0.283171	3.27211e-11
IGSF3	0.291475	8.08239e-12
HRNR	0.114788	0.00822692
KDM1A	0.305003	7.49843e-13
HNRNPCL1	0.0989865	0.0227922
SHC1	0.428467	4.94287e-25
ELAVL4	-0.242818	1.54525e-08
CORT	-0.200877	3.21179e-06
AHCTF1	0.27713	8.79181e-11
FRRS1	0.608347	7.3444e-55
LRRC7	-0.169852	8.64013e-05
ATP6V1G3	0.143581	0.000927192
LEPR	0.189104	1.19404e-05
PBX1	0.164368	0.000146241
PSMD4	-0.105717	0.0149928
TAGLN2	0.480938	5.65871e-32
CD84	0.578685	1.29257e-48
H6PD	0.605483	3.1457e-54
FOXD2	0.285108	2.37112e-11
RBM8A	0.191187	9.51966e-06
DDOST	0.6016	2.20942e-53
VPS72	-0.111421	0.0103292
ST3GAL3	0.293738	5.47726e-12
ZNF692	-0.250382	5.26982e-09
INTS11	0.215955	5.31709e-07
FGGY	0.114576	0.00834709
SLC30A10	0.160353	0.000212743
MFSD2A	0.259613	1.35111e-09
UBE2J2	0.3692	1.58116e-18
OLFM3	-0.224636	1.77681e-07
PRXL2B	0.25345	3.37223e-09
DCST1	0.177671	3.96509e-05
RHOC	0.604916	4.18937e-54
RXFP4	0.109086	0.0120548
CATSPER4	-0.0907394	0.0369447
SHISA4	-0.0966752	0.0261835
GRHL3	0.275934	1.06619e-10
GBP6	0.329284	7.6382e-15
NPPA	-0.25258	3.82959e-09
NPPB	0.106084	0.014645
KIAA2013	0.5798	7.73292e-49
PLOD1	0.617562	6.14365e-57
MIIP	0.252043	4.14148e-09
TNFRSF8	0.389373	1.35125e-20
RBBP4	0.512673	8.55679e-37
SYNC	0.519692	6.25203e-38
KIAA1522	0.166823	0.00011578
S100PBP	0.56953	8.18116e-47
FNDC5	-0.251947	4.19981e-09
HPCA	-0.272734	1.77825e-10
TMEM54	0.177763	3.92793e-05
CLCC1	0.487874	5.52003e-33
UFC1	0.213787	6.94284e-07
ADAMTS4	0.149125	0.000579507
FCER1G	0.601182	2.72117e-53
PCP4L1	-0.208315	1.34476e-06
GJA5	0.20573	1.82655e-06
GJA8	0.231155	7.57493e-08
SIPA1L2	0.598044	1.28589e-52
MFN2	0.428311	5.16307e-25
ZMPSTE24	0.633823	8.90719e-61
COL9A2	0.271441	2.18221e-10
SMAP2	0.33245	4.07137e-15
ZFP69B	0.119027	0.00612739
MTFR1L	0.419272	6.17557e-24
AUNIP	0.170561	8.06177e-05
PAQR7	0.375913	3.36265e-19
RNF220	0.151473	0.000472592
TMEM53	0.4131	3.22159e-23
ARMH1	0.258799	1.52673e-09
KIF2C	0.381221	9.63627e-20
RPS8	0.192126	8.58791e-06
BEST4	0.154408	0.000364723
PLK3	0.559599	6.37035e-45
BTBD19	0.524977	8.37025e-39
PTCH2	0.301391	1.43225e-12
EIF2B3	0.287678	1.54057e-11
HECTD3	0.495578	3.90569e-34
UROD	0.414326	2.32648e-23
NOL9	0.324844	1.8231e-14
TAS1R1	0.448113	1.71863e-27
ZBTB48	0.236304	3.79312e-08
LRRC8C	0.46321	1.7135e-29
EPHA8	-0.194123	6.88833e-06
C1QA	0.551166	2.2952e-43
C1QC	0.581333	3.80096e-49
C1QB	0.571754	3.02327e-47
HEATR1	0.309074	3.57736e-13
STX12	0.417916	8.90415e-24
PPP1R8	0.52571	6.31526e-39
THEMIS2	0.533663	2.8426e-40
RPA2	0.392825	5.78377e-21
MFAP2	0.367901	2.12447e-18
ATP13A2	0.121272	0.00522261
SDHB	0.341203	6.88122e-16
PADI2	0.274967	1.24526e-10
PADI1	0.344438	3.51614e-16
CCN1	0.471385	1.2817e-30
HHIPL2	0.164851	0.00013971
TAF1A	0.247112	8.4264e-09
MIA3	0.233378	5.63016e-08
AIDA	0.52535	7.25369e-39
BROX	0.231099	7.63074e-08
FAM177B	0.551721	1.81852e-43
TLR5	0.59639	2.89624e-52
ERMAP	0.60736	1.2142e-54
ZNF691	0.479212	1.00167e-31
DISP1	0.43915	2.38212e-26
GORAB	0.371624	9.07868e-19
HSD3B1	-0.154621	0.000357866
PHGDH	0.106248	0.0144912
INSRR	0.225422	1.60545e-07
LRRC47	0.153159	0.000407466
DMBX1	0.271827	2.05301e-10
CRTC2	0.128812	0.00299702
CREB3L4	-0.245056	1.12818e-08
JTB	0.153963	0.000379442
RAB13	0.465282	8.93951e-30
C1orf52	0.199545	3.74087e-06
BCL10	0.61925	2.51528e-57
SLC2A1	0.213524	7.16934e-07
CEP104	0.439146	2.38486e-26
DFFB	0.263898	7.05187e-10
ACP6	0.195912	5.642e-06
C1orf21	0.107259	0.013578
ZNF436	0.549207	5.19932e-43
TCEA3	0.343559	4.22288e-16
B3GALNT2	0.306285	5.94732e-13
HSPA6	0.396448	2.34792e-21
FCGR3B	0.338995	1.08336e-15
FCGR2B	0.454456	2.54951e-28
FCGR2A	0.652877	1.40836e-65
PROK1	0.116552	0.0072854
KCNA2	-0.0979685	0.024236
ZBTB18	-0.211893	8.74508e-07
MSTO1	0.0940231	0.0306022
FDPS	-0.183051	2.2749e-05
GPSM2	0.200558	3.33165e-06
DYNLT4	0.46287	1.90564e-29
C1orf43	0.206556	1.65695e-06
NRDC	0.519398	6.98248e-38
RO60	0.370738	1.11263e-18
CASQ2	0.171255	7.53198e-05
SYT6	0.219946	3.23046e-07
TSACC	0.349007	1.34399e-16
CFAP57	0.382442	7.20445e-20
EBNA1BP2	0.341674	6.24288e-16
UBIAD1	0.467226	4.83565e-30
WARS2	0.53106	7.9146e-40
MXRA8	0.400253	9.00126e-22
DMRTB1	-0.132193	0.00231423
FAM76A	0.528307	2.31563e-39
GLRX2	0.114094	0.00862583
USP33	0.366642	2.82541e-18
ADAM15	0.247403	8.08374e-09
PUM1	0.364995	4.09439e-18
SEMA6C	-0.28351	3.09291e-11
MRPS21	-0.116072	0.00753132
SLC5A9	0.474903	4.10955e-31
RCOR3	0.103469	0.0172872
C1orf194	0.422534	2.54371e-24
RUNX3	0.537553	6.05344e-41
ZCCHC17	0.331404	5.0155e-15
POGK	0.140002	0.00124508
BSDC1	0.382555	7.01408e-20
KLHDC8A	0.187371	1.43914e-05
NEXN	0.62891	1.36023e-59
PAQR6	-0.0968953	0.0258428
RGL1	0.226647	1.36969e-07
FCN3	0.206086	1.7514e-06
FUBP1	0.325352	1.65161e-14
HAO2	0.309584	3.25798e-13
UTS2	0.127966	0.00319439
PATJ	0.32332	2.44963e-14
PTBP2	0.199204	3.88916e-06
ITGB3BP	0.423471	1.96818e-24
TRIM63	0.135258	0.00182143
KCNC4	-0.0957213	0.027705
ATP2B4	0.33284	3.76589e-15
MEAF6	0.316848	8.43021e-14
PRAMEF12	0.257048	1.98263e-09
CD247	0.32833	9.21837e-15
PEX19	0.20211	2.7864e-06
FUCA1	0.557112	1.85238e-44
PPT1	0.517014	1.70859e-37
RASAL2	0.0865297	0.0466783
LGALS8	0.283973	2.86433e-11
CCNL2	0.216793	4.79234e-07
MRPL20	0.364376	4.70432e-18
VWA1	0.270209	2.64981e-10
ATAD3C	0.165711	0.000128744
ABCB10	0.152406	0.000435457
URB2	0.330025	6.59661e-15
OTUD3	0.171248	7.53675e-05
PLA2G2A	0.349436	1.22696e-16
MKNK1	0.481978	4.00555e-32
MOB3C	0.500109	7.96815e-35
ARTN	0.219633	3.36015e-07
IPO13	0.272836	1.74945e-10
DPH2	0.341033	7.1264e-16
ATP6V0B	0.294026	5.21154e-12
CCDC24	0.285956	2.05762e-11
SLC6A9	0.343582	4.20267e-16
OR14I1	-0.207204	1.53455e-06
EPHX4	-0.13774	0.00149485
SLC35E2B	0.269828	2.81279e-10
CDK11A	0.251853	4.25769e-09
NADK	0.589072	9.9479e-51
GNB1	0.372172	8.00419e-19
CD1A	0.135645	0.00176646
CD1C	0.346712	2.18292e-16
CD1B	0.214082	6.69605e-07
CD1E	0.35499	3.72365e-17
DR1	0.55696	1.97702e-44
MAPKAPK2	0.459473	5.47852e-29
IL10	0.476519	2.42607e-31
IL24	0.314032	1.43018e-13
FCMR	0.375765	3.48107e-19
PIGR	0.273562	1.55876e-10
FCAMR	0.261471	1.0206e-09
C1orf116	0.194669	6.48247e-06
PRMT6	0.450077	9.56066e-28
SH3BGRL3	0.490667	2.12932e-33
UBXN11	0.361664	8.61389e-18
CD52	0.251558	4.44395e-09
ZNF683	0.359906	1.27091e-17
HCRTR1	-0.227808	1.1772e-07
PEF1	0.422618	2.48589e-24
ORC1	0.345717	2.69024e-16
FCGR3A	0.613344	5.59716e-56
IL19	0.110724	0.0108197
SDE2	0.203937	2.25347e-06
H3-3A	0.294827	4.53686e-12
ACBD3	0.21528	5.77951e-07
MIXL1	0.205467	1.88396e-06
DEGS1	0.422395	2.64245e-24
NVL	0.14911	0.000580296
CNIH4	0.408817	9.93703e-23
BMP8A	0.162098	0.000180958
HEYL	0.19322	7.6131e-06
HPCAL4	-0.248125	7.29152e-09
PABPC4	0.587197	2.4265e-50
TARS2	0.0914013	0.0355833
GOLPH3L	0.403843	3.60146e-22
HORMAD1	0.287211	1.6667e-11
MCL1	0.459901	4.7982e-29
WNT3A	0.197492	4.72331e-06
ARF1	0.174627	5.39106e-05
C1orf35	-0.133718	0.00205556
TRIM11	-0.116845	0.00713899
TRIM17	-0.336792	1.69744e-15
H2AW	-0.189306	1.16817e-05
H2BU1	-0.156054	0.000314737
RNF187	-0.273409	1.59723e-10
PPIH	0.382343	7.37724e-20
YBX1	0.384885	4.01195e-20
P3H1	0.394011	4.31113e-21
C1orf50	0.268391	3.52209e-10
STPG1	0.106099	0.0146303
NIPAL3	0.105736	0.0149741
RCAN3	0.398465	1.41456e-21
NCMAP	0.370007	1.31536e-18
JUN	0.491639	1.52534e-33
ASH1L	0.152531	0.000430686
WDR26	0.201106	3.12828e-06
TXLNA	0.579887	7.42526e-49
IQCC	0.346726	2.17649e-16
TMEM234	0.472665	8.48427e-31
LCK	0.432984	1.38941e-25
HDAC1	0.590279	5.58651e-51
TSSK3	0.213497	7.19314e-07
FAM229A	0.1861	1.64841e-05
SLC16A4	0.600327	4.16049e-53
EIF3I	0.476924	2.12484e-31
LAMTOR5	0.439235	2.32426e-26
YTHDF2	0.479226	9.97225e-32
OPRD1	-0.101594	0.0194292
TMEM200B	0.225475	1.59447e-07
SRSF4	0.501226	5.36482e-35
MECR	0.166435	0.000120156
MTARC1	-0.256323	2.20823e-09
HLX	0.406957	1.61247e-22
MARK1	-0.13464	0.00191228
C1orf115	-0.220571	2.9854e-07
DARS2	0.292154	7.19508e-12
RC3H1	0.235713	4.1102e-08
KCND3	0.12685	0.00347288
RAB7B	0.177142	4.18392e-05
F11R	0.483123	2.73425e-32
TSTD1	0.18086	2.85809e-05
ARHGAP30	0.605922	2.51991e-54
NECTIN4	0.14702	0.000694089
PFDN2	-0.137489	0.00152524
NIT1	0.201663	2.93374e-06
DEDD	0.264368	6.56261e-10
COQ8A	-0.0981868	0.0239199
AKIRIN1	0.551298	2.17106e-43
NDUFS5	0.182775	2.34152e-05
LRIF1	0.364156	4.94167e-18
CEPT1	0.528042	2.56591e-39
DENND2D	0.558708	9.34868e-45
CHI3L2	0.618713	3.34326e-57
DRAM2	0.589064	9.98512e-51
ATP8B2	0.24046	2.14518e-08
IL6R	0.492557	1.11238e-33
SHE	0.171225	7.5539e-05
PLA2G2C	0.142742	0.000994152
UBXN10	0.0923703	0.0336672
SDHC	0.110142	0.0112454
ARNT	0.272897	1.73275e-10
PARP1	0.238524	2.80123e-08
NDUFS2	-0.112637	0.00952059
PRDX1	0.349622	1.17923e-16
NASP	0.278936	6.55892e-11
GPBP1L1	0.567374	2.13261e-46
TMEM69	0.575538	5.45928e-48
SLC39A1	0.650128	7.29006e-65
CR1	0.200885	3.20879e-06
GUK1	-0.167349	0.000110077
SERBP1	0.586299	3.71082e-50
RFX5	0.214318	6.50497e-07
MIER1	0.53291	3.82705e-40
SLC45A1	-0.118277	0.00645923
PPIAL4G	0.0872644	0.044839
WDR47	0.181599	2.647e-05
ZNF669	0.182541	2.39949e-05
SSX2IP	0.198449	4.23814e-06
TOR1AIP2	0.311217	2.41198e-13
SMIM1	0.140918	0.00115537
RNF19B	0.516514	2.05892e-37
C1orf162	0.581118	4.20013e-49
GMEB1	0.342002	5.83309e-16
CEP85	0.246057	9.79088e-09
CC2D1B	0.50697	6.85909e-36
DAB1	-0.151863	0.000456709
LRRC8B	0.11138	0.0103576
BTBD8	0.184111	2.03512e-05
ZC3H11A	0.179567	3.26597e-05
IFI16	0.535273	1.50242e-40
RGS13	0.346506	2.27961e-16
RGS4	-0.181966	2.54781e-05
CAP1	0.680926	2.59622e-73
ACOT7	-0.224418	1.82759e-07
TOR1AIP1	0.213824	6.91145e-07
HSPB11	0.408413	1.10404e-22
SDF4	0.542667	7.67854e-42
EPHB2	0.305072	7.40632e-13
TMCO1	0.333045	3.61421e-15
NBPF3	0.259671	1.33939e-09
CDK11B	0.443643	6.43999e-27
ACOT11	0.151607	0.00046709
AKR1A1	0.40264	4.90112e-22
EPB41	0.320482	4.22773e-14
HMGB4	0.0861098	0.0477577
AK2	0.604609	4.88896e-54
AZIN2	0.263834	7.12196e-10
TRIM62	0.110318	0.0111147
CTSS	0.62937	1.05605e-59
LIN9	0.100075	0.021332
RBMXL1	0.468677	3.04899e-30
GBP3	0.562785	1.60103e-45
GBP1	0.633319	1.18063e-60
GBP2	0.62661	4.79326e-59
GBP7	0.235192	4.41036e-08
GBP4	0.414917	1.9879e-23
AHDC1	0.411281	5.20808e-23
FGR	0.392894	5.68526e-21
IFI6	0.282678	3.54977e-11
IFI44L	0.453355	3.56078e-28
CYB561D1	0.341546	6.41091e-16
GPR61	-0.406313	1.90524e-22
GNAI3	0.632299	2.08568e-60
GSTM4	0.340974	7.21371e-16
PTGS2	0.228338	1.09836e-07
DDAH1	0.290096	1.02281e-11
SLC16A1	0.485235	1.34686e-32
NGF	-0.198465	4.23022e-06
NOC2L	0.298846	2.24711e-12
PLEKHN1	0.260301	1.21814e-09
ISG15	0.261337	1.04154e-09
AGRN	0.301556	1.39074e-12
MRPL37	0.372168	8.01199e-19
SERPINC1	0.158041	0.000262951
C1orf198	0.326307	1.37093e-14
AGT	0.235232	4.38656e-08
IFI44	0.43209	1.78876e-25
CHRNB2	-0.389339	1.36248e-20
ADAR	0.332884	3.73304e-15
ATPAF1	0.201749	2.90503e-06
TEX38	0.179465	3.30044e-05
EFCAB14	0.505358	1.22626e-35
PSEN2	0.241079	1.96875e-08
FCRLB	-0.195975	5.60257e-06
TRAF5	0.155903	0.000319064
SLC30A1	0.397003	2.04313e-21
RD3	-0.0988667	0.0229583
ATF6	0.358413	1.76504e-17
ACADM	0.529645	1.37597e-39
RABGGTB	0.237301	3.31141e-08
MSH4	0.238079	2.97743e-08
DENND1B	0.20009	3.51526e-06
MPL	0.214387	6.45065e-07
CDC20	0.313251	1.65418e-13
ELOVL1	0.305344	7.05089e-13
MED8	0.445866	3.34668e-27
ASPM	0.291275	8.36421e-12
C1orf174	0.420374	4.58162e-24
IQGAP3	0.265415	5.58623e-10
NAXE	0.198823	4.06162e-06
HAPLN2	-0.0928042	0.0328383
NES	0.318316	6.3867e-14
CRABP2	0.166571	0.000118603
ISG20L2	0.289911	1.0554e-11
MRPL24	-0.0917755	0.0348327
HDGF	0.298002	2.60689e-12
SH2D2A	0.443109	7.52932e-27
C1orf185	0.125016	0.00397841
RNF11	0.251296	4.61643e-09
EPS15	0.350697	9.37852e-17
C1orf159	0.113668	0.00887957
TTC39A	0.22455	1.79661e-07
SAMD11	-0.111488	0.0102827
MFSD14A	0.49447	5.73972e-34
SASS6	0.448051	1.7507e-27
TRMT13	0.311189	2.42467e-13
LRRC39	0.209117	1.22186e-06
DBT	0.376665	2.821e-19
RTCA	0.443732	6.27263e-27
BRDT	-0.220488	3.01657e-07
KHDRBS1	0.359656	1.34288e-17
TMEM39B	0.337507	1.46774e-15
KPNA6	0.470354	1.7843e-30
DDX20	0.541569	1.20015e-41
RPL5	0.190777	9.95524e-06
DIPK1A	0.294348	4.92933e-12
MTF2	0.38801	1.88404e-20
SH2D5	-0.24987	5.67424e-09
HP1BP3	0.497444	2.03485e-34
ECE1	0.525286	7.43299e-39
SUSD4	-0.207422	1.49543e-06
CCDC185	-0.239133	2.57647e-08
LRRIQ3	0.426061	9.64241e-25
CRYZ	0.499424	1.01477e-34
TYW3	0.375741	3.50026e-19
FPGT-TNNI3K	0.156436	0.000304099
OBSCN	-0.127077	0.00341451
H2BC18	0.286274	1.95089e-11
H3C13	0.143224	0.000955193
H4C14	0.282268	3.79847e-11
H2AC19	0.10017	0.0212087
H2BC21	0.228959	1.01231e-07
H2AC20	0.17146	7.38135e-05
BOLA1	-0.125701	0.00378208
SV2A	-0.254299	2.97733e-09
SF3B4	0.143157	0.000960545
FCGR1A	0.482113	3.82926e-32
GPR25	0.130461	0.00264396
KIF21B	-0.27387	1.48401e-10
IGFN1	-0.248326	7.08411e-09
CACNA1S	-0.0876506	0.0438969
SAMD13	0.253111	3.54381e-09
MTR	0.171777	7.15444e-05
SRP9	0.19446	6.63476e-06
TMEM63A	0.207761	1.43632e-06
PYCR2	0.214405	6.43644e-07
LEFTY2	0.521336	3.35754e-38
TARDBP	0.332014	4.44195e-15
MASP2	0.154101	0.000374817
SRM	0.241608	1.82934e-08
EXOSC10	0.427117	7.19766e-25
SYF2	0.425682	1.07096e-24
RSRP1	0.207112	1.55136e-06
RHD	0.0874229	0.0444502
TMEM50A	0.571055	4.138e-47
RHCE	0.117123	0.00700207
MACO1	0.176346	4.53531e-05
TSEN15	0.308141	4.24301e-13
NTRK1	0.237988	3.01488e-08
FMN2	0.25877	1.53335e-09
GREM2	-0.199301	3.84653e-06
YARS1	0.270843	2.39818e-10
HNRNPR	0.399963	9.68881e-22
ADAMTSL4	0.510336	2.01703e-36
PTP4A2	0.527806	2.81153e-39
GON4L	0.256252	2.23158e-09
CRYBG2	0.107319	0.0135254
FNBP1L	0.560719	3.9258e-45
ZFYVE9	0.199993	3.55427e-06
PDPN	0.546912	1.34654e-42
TMCO4	0.481674	4.43228e-32
HYI	0.18541	1.77388e-05
NTNG1	0.150288	0.000524038
B4GALT2	0.231269	7.46109e-08
OLFML2B	0.620784	1.11112e-57
TTC24	0.272156	1.9489e-10
DNASE2B	0.366342	3.02332e-18
OR2L2	-0.106162	0.0145715
OR2L3	-0.181539	2.66366e-05
OR2M4	-0.157911	0.000266082
TMEM222	0.346235	2.41325e-16
LGR6	0.245812	1.01371e-08
MANEAL	0.192732	8.03385e-06
TNFRSF14	0.358173	1.86045e-17
RSBN1	0.412231	4.05396e-23
YOD1	0.205551	1.86527e-06
IRF2BP2	0.24638	9.35159e-09
RBM15	0.468385	3.34577e-30
AKR7A2	0.430888	2.50959e-25
KLHDC7A	0.241555	1.84275e-08
MTX1	0.118897	0.00618358
LRRC41	0.531921	5.64685e-40
SNX27	0.0874523	0.0443784
CELF3	-0.449021	1.31091e-27
RIIAD1	-0.38639	2.79052e-20
MRPL9	0.137521	0.00152138
OAZ3	-0.131283	0.00248245
TDRKH	-0.208328	1.34262e-06
LINGO4	-0.193814	7.12867e-06
RORC	0.088899	0.0409646
C2CD4D	-0.138268	0.00143275
THEM4	-0.0993528	0.0222913
S100A10	0.585321	5.88713e-50
STIL	0.439694	2.03492e-26
NCDN	-0.138517	0.00140434
HPDL	0.105787	0.014926
OR2L5	-0.100019	0.0214041
MAN1C1	0.554359	5.9794e-44
SELENON	0.608957	5.37709e-55
MAB21L3	0.158668	0.000248341
SYPL2	0.301504	1.40363e-12
ACTA1	-0.202329	2.71656e-06
ZFP69	0.130661	0.0026037
ZNF684	0.514988	3.63404e-37
EXO5	0.176124	4.63793e-05
TRNAU1AP	0.460025	4.61818e-29
TAF12	0.549254	5.10031e-43
RAB42	0.503652	2.26109e-35
AMY2A	-0.138067	0.00145609
KISS1	-0.164197	0.00014862
GOLT1A	-0.119255	0.00602951
PLEKHA6	-0.291623	7.88073e-12
PPP1R15B	0.22222	2.42161e-07
MDM4	0.108695	0.012367
CDC42BPA	0.0998117	0.0216773
ZMYM1	0.515288	3.25075e-37
SFPQ	0.16856	9.79504e-05
GLMN	0.256344	2.20141e-09
RPAP2	0.359281	1.45867e-17
GFI1	0.535702	1.26683e-40
EVI5	0.581905	2.91308e-49
OR6K3	0.112947	0.00932339
MNDA	0.490341	2.38053e-33
OR14A16	0.0934052	0.0317189
TRIM58	0.158885	0.000243451
OR2AJ1	-0.184433	1.96709e-05
MUTYH	0.268831	3.28814e-10
ZSCAN20	0.399892	9.86448e-22
OR2M5	-0.094062	0.030533
PRRC2C	0.284715	2.53154e-11
GABRD	-0.358048	1.91201e-17
ZBTB17	0.205992	1.77093e-06
HSPB7	0.286866	1.76637e-11
CLCNKA	0.127877	0.00321586
FAM131C	-0.191824	8.87819e-06
CLCNKB	0.167112	0.000112615
CFHR3	0.345519	2.80451e-16
OR2T8	-0.120687	0.00544576
EFHD2	0.112636	0.0095212
CTRC	0.185719	1.71665e-05
FHAD1	0.350756	9.26134e-17
OR2T33	-0.105683	0.015025
ZBTB8A	0.19376	7.17128e-06
ZBTB8OS	0.347415	1.88235e-16
OR2B11	0.256911	2.0235e-09
NRAS	0.528435	2.20323e-39
CSDE1	0.539999	2.26462e-41
SIKE1	0.462631	2.05349e-29
OR2G6	-0.0874771	0.044318
OR2M3	-0.148676	0.000602395
OR2T10	-0.114586	0.00834135
OR2T11	0.107613	0.0132701
SPTA1	0.224953	1.7057e-07
ZRANB2	0.304441	8.29747e-13
CERS2	0.549434	4.73063e-43
ANXA9	0.0870532	0.0453613
PRUNE1	0.435212	7.37667e-26
CDC42SE1	0.244018	1.30574e-08
MLLT11	-0.193208	7.62329e-06
IER5	0.173739	5.89112e-05
MR1	0.569744	7.43723e-47
KMO	0.331985	4.46746e-15
OPN3	0.276302	1.0049e-10
KIF1B	0.251491	4.48756e-09
ATAD3A	0.257488	1.85718e-09
SSU72	0.389444	1.32801e-20
MIB2	0.143602	0.0009256
BCL9	0.219526	3.40568e-07
EXO1	0.195503	5.9063e-06
MAP1LC3C	0.365934	3.3149e-18
WDR64	0.0904638	0.0375244
DYNLT5	0.380528	1.1358e-19
DNAI4	0.670644	2.2295e-70
SGIP1	-0.113153	0.00919485
LBR	0.285093	2.37677e-11
DCDC2B	0.231476	7.25844e-08
DYRK3	0.408301	1.13677e-22
TNFSF18	0.177109	4.1983e-05
CMPK1	0.515436	3.07658e-37
MAP10	0.389174	1.41846e-20
LHX8	0.137377	0.00153902
RAP1GAP	-0.359329	1.44312e-17
NT5C1A	-0.163053	0.000165493
TRIM67	-0.404325	3.18206e-22
RALGPS2	0.263738	7.22738e-10
FPGT	0.626905	4.08089e-59
NUDT4B	0.12623	0.00363671
LEXM	-0.111623	0.0101908
RPRD2	0.132826	0.00220341
NBPF19	0.196286	5.41045e-06
NSUN4	0.404967	2.69706e-22
OR2T4	-0.087154	0.0451115
INSL5	0.377087	2.55569e-19
ZNF124	0.245761	1.02101e-08
ASCL5	-0.243449	1.4145e-08
FAM72C	0.099788	0.0217086
PI4KB	0.268904	3.25085e-10
SLC2A7	0.11844	0.00638594
LMNA	0.305324	7.07672e-13
MACF1	0.422333	2.68768e-24
NBPF1	0.32131	3.6076e-14
LDLRAD2	0.375818	3.43812e-19
HSPG2	0.485046	1.43496e-32
CDC42	0.595727	4.00662e-52
WNT4	0.150843	0.000499327
RHEX	0.150173	0.000529275
AVPR1B	-0.099671	0.021864
FAM72A	0.404302	3.20073e-22
SRGAP2	0.438322	3.02419e-26
IKBKE	0.42021	4.78985e-24
RASSF5	0.476174	2.71537e-31
CROCC	0.224724	1.75681e-07
VASH2	-0.149431	0.000564394
CYB5RL	0.426756	7.95528e-25
VWA5B1	0.099705	0.0218188
CENPL	0.429462	3.74356e-25
ZNF496	0.15742	0.000278208
FCER1A	0.351495	7.90829e-17
RABGAP1L	-0.140931	0.00115409
AMPD1	0.233662	5.42016e-08
CSMD2	0.215135	5.88316e-07
CD101	0.356545	2.65607e-17
ITPKB	0.411376	5.07953e-23
PER3	0.111184	0.0104938
H3-2	0.312801	1.79875e-13
TAFA3	0.205557	1.86407e-06
PEAR1	0.16482	0.000140121
NPL	0.333357	3.39505e-15
RCC1	0.402339	5.29276e-22
CCDC18	0.510388	1.97895e-36
C1orf141	0.0876411	0.0439197
MROH9	0.0880341	0.0429779
PTPN7	0.580471	5.66927e-49
NBPF15	0.13217	0.00231841
C1orf109	0.48423	1.88756e-32
HTR1D	0.299215	2.10578e-12
CRNN	0.0967911	0.0260036
TEKT2	0.317014	8.17082e-14
ADPRS	0.487742	5.77246e-33
COL8A2	0.578524	1.39257e-48
TRAPPC3	0.550321	3.26744e-43
MAP7D1	0.271719	2.0884e-10
ZNF362	0.39524	3.17539e-21
A3GALT2	0.231913	6.84832e-08
PHC2	0.477992	1.49714e-31
OR2C3	0.135393	0.00180206
EIF4G3	0.315443	1.09823e-13
S100A6	0.508693	3.67187e-36
S100A5	0.158107	0.000261384
S100A4	0.507597	5.4648e-36
S100A3	0.568743	1.16181e-46
S100A2	0.442751	8.36171e-27
S100A16	0.351044	8.70781e-17
S100A14	0.148447	0.000614333
S100A13	0.147225	0.00068204
CHTOP	0.217923	4.16337e-07
SNAPIN	0.464346	1.19995e-29
SH3D21	0.213332	7.3401e-07
STK40	0.604484	5.20807e-54
LSM10	0.480247	7.1154e-32
OSCP1	0.385439	3.51095e-20
MRPS15	0.440399	1.65904e-26
CSF3R	0.553234	9.61938e-44
EVA1B	0.351852	7.32573e-17
ACP1	0.114896	0.00816589
TRAPPC12	-0.199419	3.79527e-06
ID2	0.159796	0.000223934
ALLC	0.101827	0.0191513
SNTG2	0.0865959	0.0465101
COLEC11	0.155656	0.000326194
RNASEH1	0.205791	1.81332e-06
IAH1	0.219526	3.40562e-07
ADAM17	0.409223	8.93514e-23
RPS7	0.0995368	0.0220434
SMC6	0.188727	1.24376e-05
ASAP2	0.241719	1.8013e-08
YWHAQ	0.271055	2.31941e-10
APOB	0.286859	1.76842e-11
DCDC2C	0.1661	0.000124058
UCN	-0.299382	2.04467e-12
KCNK3	-0.441832	1.09363e-26
MAPRE3	-0.274111	1.42802e-10
SRD5A2	0.244479	1.22383e-08
OSR1	0.278002	7.63461e-11
WDCP	0.114087	0.0086301
DPYSL5	0.174906	5.24282e-05
MYCN	-0.128862	0.00298566
MPV17	0.250547	5.14599e-09
EFR3B	-0.1241	0.0042552
GEN1	0.116314	0.00740662
VSNL1	-0.238192	2.93161e-08
NT5C1B	0.207668	1.45232e-06
THUMPD2	0.0909806	0.0364436
SLC30A3	-0.237236	3.34129e-08
NOL10	0.347165	1.98423e-16
TP53I3	0.192149	8.5665e-06
PCARE	0.15985	0.000222836
ATRAID	0.402124	5.59192e-22
CYP1B1	0.279015	6.47498e-11
TMEM178A	-0.0981705	0.0239434
LDAH	0.25787	1.75423e-09
MATN3	0.215909	5.3472e-07
HS1BP3	0.22144	2.67401e-07
ATAD2B	0.226856	1.333e-07
SRBD1	0.449669	1.08022e-27
TTC27	0.227633	1.20455e-07
CAPN13	-0.0861852	0.0475622
LTBP1	0.556909	2.02101e-44
CAPN14	-0.215173	5.85599e-07
PPP1CB	0.471318	1.30955e-30
MSH2	0.224369	1.83895e-07
GDF7	0.159115	0.000238383
XDH	0.142318	0.00102965
SUPT7L	0.110874	0.0107122
C2orf73	0.215356	5.72523e-07
DNAJC5G	-0.202065	2.80068e-06
PRKCE	-0.212254	8.36946e-07
LHCGR	0.174562	5.42637e-05
MAP4K3	0.222523	2.32981e-07
CGREF1	-0.358423	1.76105e-17
OST4	0.454295	2.67793e-28
FOSL2	0.4872	6.9368e-33
KHK	-0.188226	1.31269e-05
EMILIN1	0.470983	1.45835e-30
CAD	0.233514	5.52877e-08
KCNG3	-0.117073	0.00702656
STRN	0.151056	0.000490141
CENPA	0.276964	9.0305e-11
SERTAD2	0.228083	1.13568e-07
EFEMP1	0.362201	7.6439e-18
EHD3	-0.174745	5.32803e-05
PAPOLG	0.270817	2.40799e-10
CHAC2	0.213256	7.40849e-07
HADHB	0.128126	0.00315612
FEZ2	0.405382	2.4232e-22
OXER1	0.376799	2.73365e-19
SLC3A1	-0.309265	3.45477e-13
ANXA4	0.282204	3.83906e-11
GPN1	0.331563	4.85929e-15
CPSF3	0.15018	0.000528981
HAAO	0.483173	2.68901e-32
ACYP2	0.13222	0.00230934
WDPCP	0.241379	1.88832e-08
PEX13	0.402964	4.51101e-22
FAM161A	0.200775	3.24952e-06
ATP6V1B1	-0.114145	0.00859597
ATL2	0.167776	0.000105647
PCYOX1	0.262746	8.4092e-10
NBAS	0.184636	1.92538e-05
PPP4R3B	0.230937	7.79653e-08
ERLEC1	0.0917987	0.0347866
USP34	0.184674	1.91769e-05
VAX2	-0.246525	9.16128e-09
ETAA1	0.186723	1.54248e-05
ZFP36L2	0.565175	5.62367e-46
EML6	0.25461	2.84393e-09
TRMT61B	0.174734	5.3338e-05
WDR92	0.172557	6.62468e-05
PUS10	0.341959	5.8861e-16
MCFD2	0.336882	1.66677e-15
MRPL33	0.152126	0.000446303
PFN4	0.176634	4.4053e-05
HNRNPLL	0.184329	1.98877e-05
TMEM150A	0.39951	1.08645e-21
PNO1	0.316049	9.79985e-14
NAGK	0.234465	4.86526e-08
MAT2A	0.337855	1.36737e-15
PNPT1	0.227005	1.30724e-07
EPCAM	-0.314315	1.35647e-13
SIX2	0.282376	3.73145e-11
SIX3	0.114929	0.00814787
SLC35F6	0.370211	1.25537e-18
C2orf68	0.125106	0.00395194
PSME4	0.446946	2.43114e-27
POLE4	0.118553	0.00633538
EGR4	-0.231364	7.36757e-08
TEX261	0.460007	4.64303e-29
GGCX	0.447044	2.36149e-27
REG1A	0.202234	2.74651e-06
CLEC4F	-0.258878	1.50859e-09
ASB3	0.1029	0.0179143
ARHGAP25	0.614328	3.35344e-56
CAMKMT	0.268523	3.45009e-10
SLC5A6	0.0883731	0.0421791
RAB11FIP5	0.142653	0.0010015
SOCS5	0.129474	0.00285035
GPR75	0.158491	0.000252389
FAHD2A	-0.164461	0.000144962
ADD2	-0.118638	0.0062976
KCMF1	0.23277	6.10832e-08
TMSB10	0.337185	1.56718e-15
CD8B	0.406342	1.89069e-22
MRPL19	0.340797	7.48219e-16
ANKRD53	0.407292	1.47801e-22
FABP1	-0.0890451	0.0406324
ATOH8	-0.386548	2.686e-20
SFTPB	0.140705	0.00117569
PLB1	0.545951	2.00142e-42
NCAPH	0.215272	5.78519e-07
FOXN2	0.0978486	0.0244111
COMMD1	0.28634	1.92945e-11
SPTBN1	0.310477	2.76495e-13
PKDCC	-0.169515	8.92783e-05
REG1B	0.118773	0.00623776
RNF181	0.133215	0.00213783
TCF7L1	0.134813	0.00188635
HK2	0.572448	2.21194e-47
CAPG	0.507509	5.64332e-36
USP39	0.292656	6.59979e-12
GALNT14	-0.198539	4.19488e-06
CNOT11	0.506853	7.15544e-36
TACR1	-0.192601	8.15101e-06
CIB4	-0.111401	0.0103433
VAMP8	0.54024	2.05501e-41
YPEL5	0.131562	0.00242967
LGALSL	-0.0931116	0.0322616
TMEM214	0.451656	5.94961e-28
KCNIP3	-0.301373	1.43685e-12
PLEK	0.589065	9.98249e-51
SLC9A2	-0.302486	1.17829e-12
RPL31	-0.113238	0.00914197
TMEM131	0.274971	1.24441e-10
C2orf49	0.195311	6.03424e-06
RNF149	0.49875	1.28654e-34
GCFC2	0.300901	1.5626e-12
ATP6V1C2	0.0893444	0.0399594
DNAH6	0.315898	1.00831e-13
LAPTM4A	0.560617	4.10326e-45
CCDC88A	0.234874	4.60398e-08
MEIS1	0.148715	0.000600382
KRCC1	0.338502	1.19821e-15
FAM110C	0.215954	5.31766e-07
FBXO48	0.117511	0.00681504
CREG2	-0.201299	3.05963e-06
OTX1	0.22752	1.22237e-07
UBXN2A	0.412996	3.31133e-23
GPR45	-0.0959497	0.0273339
ST6GAL2	-0.233401	5.61289e-08
RASGRP3	0.272726	1.78045e-10
TSPYL6	-0.110116	0.011264
ALK	-0.113485	0.0089901
TCF23	0.278332	7.23555e-11
TGFA	-0.106352	0.0143951
AGBL5	0.227707	1.19289e-07
VWA3B	0.302625	1.14929e-12
SRSF7	0.121333	0.00519987
TGOLN2	0.401462	6.61982e-22
CLIP4	-0.110265	0.0111538
NEURL3	0.29371	5.50404e-12
FAM166C	0.0858216	0.0485105
TTC7A	0.58066	5.1931e-49
GTF3C2	0.203546	2.3585e-06
APLF	0.188749	1.24078e-05
TMEM87B	0.357377	2.21458e-17
EMX1	-0.191154	9.55402e-06
PPP1R21	0.213153	7.50215e-07
VAMP5	0.49031	2.40652e-33
TSGA10	0.190623	1.01244e-05
SEMA4F	-0.124267	0.00420336
MFSD9	0.204793	2.039e-06
SLC5A7	-0.100735	0.0204863
IL1B	0.326171	1.40773e-14
CRIM1	0.280936	4.72995e-11
SUCLG1	-0.190179	1.0626e-05
RANBP2	0.313067	1.71183e-13
ADRA2B	0.210121	1.08318e-06
EML4	0.454589	2.44879e-28
SH3RF3	0.164286	0.000147365
CIAO1	0.185681	1.72345e-05
TMEM182	0.142742	0.000994205
RETSAT	0.443044	7.67372e-27
GALM	0.537103	7.24719e-41
IL36B	0.202281	2.73172e-06
PREB	0.194168	6.85416e-06
ACTR3	0.498104	1.61447e-34
DDX18	0.147376	0.000673337
RDH14	0.260123	1.25129e-09
BIRC6	0.103251	0.0175243
EN1	0.302217	1.23623e-12
CCDC148	0.281564	4.26572e-11
C2orf76	0.190925	9.79637e-06
GCC2	0.204125	2.20474e-06
SPR	-0.158457	0.000253165
SF3B6	0.184116	2.03387e-05
MAP3K20	0.425682	1.07087e-24
HS6ST1	0.402241	5.42689e-22
TMEM185B	0.476099	2.78309e-31
IL36G	0.0953957	0.0282414
CHMP3	0.225147	1.66364e-07
SOWAHC	0.398472	1.41205e-21
NCKAP5	0.277408	8.40587e-11
NCK2	0.480817	5.89121e-32
THSD7B	0.168857	9.51715e-05
HIBCH	0.160904	0.000202171
LIMS1	0.614759	2.67779e-56
COX5B	-0.165686	0.00012905
DRC1	0.20061	3.31156e-06
MGAT4A	0.487614	6.02771e-33
NPAS2	0.139252	0.0013233
ELMOD3	0.156475	0.000303045
SNRNP200	0.151775	0.000460236
FSIP2	0.123009	0.00460721
MARS2	0.226477	1.40019e-07
KCNJ3	-0.180529	2.95767e-05
TMEM177	-0.178604	3.60487e-05
GALNT13	-0.156513	0.00030201
CCDC138	0.335677	2.12792e-15
RAB1A	0.248368	7.04194e-09
MFSD6	-0.142956	0.000976701
HAT1	0.512854	8.00289e-37
PARD3B	0.316065	9.7714e-14
PTPN18	0.403863	3.58253e-22
CXCR2	0.486903	7.67026e-33
CDCA7	0.233722	5.37654e-08
CBWD2	0.35839	1.77417e-17
PLCL1	-0.103469	0.017287
TGFBRAP1	0.131299	0.00247941
STK17B	0.21305	7.59648e-07
SLC20A1	0.171899	7.06941e-05
MAP4K4	0.16417	0.000148999
SH2D6	-0.179121	3.41888e-05
INSIG2	0.1951	6.17861e-06
SLC4A5	-0.108485	0.0125381
SAG	-0.10111	0.0200189
C2orf80	-0.272093	1.96847e-10
ACTR1B	-0.127064	0.00341779
CXCR1	0.219529	3.40427e-07
INPP1	-0.151143	0.000486418
NEMP2	0.21803	4.10832e-07
IGFBP2	0.369356	1.52597e-18
HNMT	0.171455	7.38517e-05
MCM6	0.132591	0.00224393
CFAP221	0.286806	1.78415e-11
RAPGEF4	-0.200537	3.33971e-06
SEPTIN10	0.487057	7.28055e-33
IL1R2	0.295104	4.32372e-12
METAP1D	-0.140786	0.00116789
CXCR4	0.549459	4.68231e-43
TBR1	-0.212243	8.38098e-07
FIGN	0.21847	3.88817e-07
TTL	0.123364	0.00449
KCTD18	0.261065	1.0853e-09
CNRIP1	-0.286864	1.76681e-11
SPP2	0.130167	0.00270389
IGFBP5	0.536522	9.1386e-41
KYNU	0.613866	4.2651e-56
SCN9A	0.145765	0.000772025
SPOPL	0.148155	0.000629917
GALNT5	0.323316	2.45179e-14
CCDC141	0.171154	7.60707e-05
ANKRD36C	-0.132109	0.00232935
FAM117B	-0.114199	0.00856447
LY75-CD302	0.317398	7.59897e-14
SGO2	0.321409	3.53968e-14
ITGAV	0.415505	1.69954e-23
CWC22	0.217206	4.55296e-07
ZC3H8	-0.214709	6.20047e-07
BMPR2	0.13817	0.00144413
SPRED2	0.147377	0.000673269
PDE11A	-0.240564	2.11446e-08
DARS1	0.187054	1.48879e-05
INHBB	0.308845	3.73089e-13
LNPK	0.0941271	0.0304175
CSRNP3	-0.168016	0.000103232
ARPC2	0.459756	5.01833e-29
CKAP2L	0.226719	1.35697e-07
RBMS1	0.63219	2.216e-60
DLX1	-0.129538	0.00283652
ZNF385B	-0.093679	0.0312198
RALB	0.206536	1.66093e-06
ARL4C	0.18893	1.21669e-05
AP1S3	0.252039	4.14385e-09
SMYD5	-0.121116	0.00528152
EDAR	0.198182	4.36824e-06
RNF103-CHMP3	-0.144415	0.000864802
ICOS	0.442731	8.4108e-27
MDH1B	0.308937	3.66876e-13
AOX1	0.351942	7.18495e-17
SPAG16	0.298785	2.27172e-12
BARD1	0.557334	1.68514e-44
FMNL2	0.167204	0.000111619
GPBAR1	0.319804	4.8124e-14
FAM98A	0.236352	3.76846e-08
UBE2E3	0.13003	0.00273245
LY75	0.510104	2.19592e-36
UNC80	-0.356236	2.84106e-17
WDFY1	0.190153	1.06555e-05
C1QL2	-0.273379	1.60477e-10
ARHGAP15	0.617098	7.84704e-57
TNP1	0.178001	3.83388e-05
GTF2A1L	0.1292	0.0029103
ZSWIM2	0.212867	7.7686e-07
ACADL	0.34263	5.12153e-16
FAM124B	0.344717	3.31722e-16
ITPRID2	0.390067	1.14016e-20
DNAH7	0.233281	5.70445e-08
NCKAP1	0.119138	0.00607943
VWC2L	-0.348932	1.36541e-16
MLPH	0.20427	2.16763e-06
EPB41L5	0.33932	1.01358e-15
TMEM169	-0.201306	3.05712e-06
SESTD1	0.177605	3.99159e-05
GYPC	0.4192	6.29641e-24
GAL3ST2	0.112366	0.00969532
ITGB6	0.120477	0.00552827
PRLH	0.129506	0.00284359
CAB39	0.231004	7.72822e-08
ANAPC1	0.172789	6.47384e-05
PDCL3	0.159096	0.000238801
ATF2	0.0919649	0.0344579
TWIST2	0.147106	0.000689022
CUL3	0.188217	1.31401e-05
TANC1	0.483024	2.82581e-32
STEAP3	0.516321	2.21323e-37
RPL37A	-0.122579	0.00475308
SATB2	0.124134	0.0042445
TMEFF2	-0.20538	1.90317e-06
PLA2R1	0.32606	1.4386e-14
RAB17	-0.0983441	0.0236944
STAM2	0.273483	1.57851e-10
ABCA12	0.297884	2.66155e-12
INO80D	0.158119	0.000261082
FASTKD2	0.299859	1.87938e-12
XRCC5	0.246677	8.96492e-09
SCG2	-0.180469	2.97584e-05
MERTK	0.322859	2.67772e-14
CYTIP	0.605599	2.96672e-54
TANK	0.489742	2.92153e-33
RBM45	0.1729	6.40313e-05
RGPD8	0.156665	0.000297897
PDE1A	-0.206829	1.6042e-06
ANKRD44	0.194395	6.683e-06
NYAP2	-0.336412	1.83353e-15
KCNH7	-0.2526	3.8188e-09
BZW1	0.440123	1.79712e-26
C2orf88	0.283273	3.21709e-11
PSMD14	0.113255	0.00913152
SLC4A10	-0.240085	2.25935e-08
CRYGA	-0.182655	2.37107e-05
CPS1	0.223663	2.01353e-07
GPC1	0.187855	1.36626e-05
ITM2C	0.258509	1.59444e-09
TLK1	0.205987	1.77199e-06
KLF7	0.302927	1.08887e-12
MTERF4	-0.171713	7.20024e-05
GPR55	0.327678	1.04804e-14
POLR1B	0.127441	0.00332281
GBX2	0.177334	4.1033e-05
TFPI	0.408725	1.01782e-22
GPR39	0.101107	0.0200222
CTLA4	0.352874	5.88093e-17
SLC25A12	-0.193824	7.12074e-06
RPE	0.315838	1.01967e-13
OSBPL6	0.116254	0.00743725
GORASP2	0.291141	8.5578e-12
GPR1	0.261362	1.03756e-09
UGGT1	0.295977	3.71448e-12
ACKR3	0.345827	2.62924e-16
DTYMK	0.232405	6.41303e-08
ACMSD	0.255172	2.61815e-09
IL1A	0.419043	6.5707e-24
CD302	0.608462	6.92342e-55
KANSL1L	0.501584	4.72555e-35
PPP3R1	-0.114599	0.00833354
B3GALT1	0.117123	0.00700188
PROM2	-0.148067	0.000634687
RBM43	0.410809	5.89675e-23
SP100	0.655457	2.96311e-66
ZRANB3	0.220866	2.87579e-07
SPHKAP	-0.289492	1.13333e-11
ASB1	-0.186778	1.53344e-05
ZNF2	0.154086	0.000375319
MREG	0.362155	7.72266e-18
TMEM17	0.101859	0.019113
CATIP	0.259479	1.37858e-09
CRYGD	-0.098619	0.0233046
SPATS2L	0.590456	5.13161e-51
MARCHF4	-0.451209	6.80489e-28
PLEKHM3	0.0958943	0.0274236
BAZ2B	0.153692	0.000388664
CNGA3	0.19437	6.70191e-06
CREB1	0.319908	4.71722e-14
MSTN	0.215724	5.47102e-07
RPRM	-0.217259	4.52289e-07
INPP5D	0.645901	8.83402e-64
SLC35F5	0.441639	1.15675e-26
EPHA4	0.273582	1.55386e-10
B3GNT2	0.394785	3.55653e-21
TMBIM1	0.457836	9.07345e-29
RAB6C	-0.229226	9.7742e-08
PPP1R7	-0.209623	1.14998e-06
WDR43	0.226486	1.3986e-07
METTL21A	0.152633	0.000426834
FZD5	0.481165	5.24807e-32
SUMO1	0.136249	0.0016839
CCDC93	0.15562	0.000327274
GAD1	-0.271769	2.07206e-10
GULP1	0.200744	3.26107e-06
CD28	0.34727	1.94075e-16
RBKS	0.241085	1.96724e-08
MTX2	-0.108326	0.0126686
WDR75	0.132361	0.00228429
SLC11A1	0.541802	1.09179e-41
SMARCAL1	0.313941	1.45465e-13
FARP2	0.152797	0.000420688
ZNF514	-0.118275	0.00646007
FIGLA	-0.115153	0.00802333
SNED1	0.264854	6.09027e-10
D2HGDH	-0.324599	1.91233e-14
TMEM37	0.440805	1.47439e-26
MARCHF7	0.226008	1.48806e-07
COL5A2	0.384408	4.49945e-20
VIL1	0.220755	2.9165e-07
ANO7	0.195956	5.61421e-06
STK25	-0.167275	0.000110868
MYO1B	0.265436	5.56875e-10
SEPTIN2	0.259921	1.28994e-09
KCNF1	-0.322621	2.80386e-14
SLC66A3	0.56894	1.06403e-46
ROCK2	0.228806	1.0329e-07
E2F6	0.292264	7.0594e-12
NR4A2	0.178646	3.58957e-05
GPD2	0.218818	3.72252e-07
NAB1	0.274633	1.3137e-10
STAT4	-0.107556	0.0133193
MSH6	0.271675	2.10289e-10
RHOQ	0.561254	3.11369e-45
PIGF	0.303516	9.79743e-13
CRIPT	0.20537	1.90543e-06
UGT1A1	0.112146	0.00983988
HJURP	0.203199	2.45571e-06
[truncated: 11,704 more rows]

## Sheet: S4
Table-S4: The gene sets used in our work for marking each immune infiltration cell type
Metagene	Cell.type	Immunity
ADAM28	Activated.B.cell	Adaptive
CD180	Activated.B.cell	Adaptive
CD79B	Activated.B.cell	Adaptive
BLK	Activated.B.cell	Adaptive
CD19	Activated.B.cell	Adaptive
MS4A1	Activated.B.cell	Adaptive
TNFRSF17	Activated.B.cell	Adaptive
IGHM	Activated.B.cell	Adaptive
GNG7	Activated.B.cell	Adaptive
MICAL3	Activated.B.cell	Adaptive
SPIB	Activated.B.cell	Adaptive
HLA-DOB	Activated.B.cell	Adaptive
IGKC	Activated.B.cell	Adaptive
PNOC	Activated.B.cell	Adaptive
FCRL2	Activated.B.cell	Adaptive
BACH2	Activated.B.cell	Adaptive
CR2	Activated.B.cell	Adaptive
TCL1A	Activated.B.cell	Adaptive
AKNA	Activated.B.cell	Adaptive
ARHGAP25	Activated.B.cell	Adaptive
CCL21	Activated.B.cell	Adaptive
CD27	Activated.B.cell	Adaptive
CD38	Activated.B.cell	Adaptive
CLEC17A	Activated.B.cell	Adaptive
CLEC9A	Activated.B.cell	Adaptive
CLECL1	Activated.B.cell	Adaptive
AIM2	Activated.CD4.T.cell	Adaptive
BIRC3	Activated.CD4.T.cell	Adaptive
BRIP1	Activated.CD4.T.cell	Adaptive
CCL20	Activated.CD4.T.cell	Adaptive
CCL4	Activated.CD4.T.cell	Adaptive
CCL5	Activated.CD4.T.cell	Adaptive
CCNB1	Activated.CD4.T.cell	Adaptive
CCR7	Activated.CD4.T.cell	Adaptive
DUSP2	Activated.CD4.T.cell	Adaptive
ESCO2	Activated.CD4.T.cell	Adaptive
ETS1	Activated.CD4.T.cell	Adaptive
EXO1	Activated.CD4.T.cell	Adaptive
EXOC6	Activated.CD4.T.cell	Adaptive
IARS	Activated.CD4.T.cell	Adaptive
ITK	Activated.CD4.T.cell	Adaptive
KIF11	Activated.CD4.T.cell	Adaptive
KNTC1	Activated.CD4.T.cell	Adaptive
NUF2	Activated.CD4.T.cell	Adaptive
PRC1	Activated.CD4.T.cell	Adaptive
PSAT1	Activated.CD4.T.cell	Adaptive
RGS1	Activated.CD4.T.cell	Adaptive
RTKN2	Activated.CD4.T.cell	Adaptive
SAMSN1	Activated.CD4.T.cell	Adaptive
SELL	Activated.CD4.T.cell	Adaptive
TRAT1	Activated.CD4.T.cell	Adaptive
ADRM1	Activated.CD8.T.cell	Adaptive
AHSA1	Activated.CD8.T.cell	Adaptive
C1GALT1C1	Activated.CD8.T.cell	Adaptive
CCT6B	Activated.CD8.T.cell	Adaptive
CD37	Activated.CD8.T.cell	Adaptive
CD3D	Activated.CD8.T.cell	Adaptive
CD3E	Activated.CD8.T.cell	Adaptive
CD3G	Activated.CD8.T.cell	Adaptive
CD69	Activated.CD8.T.cell	Adaptive
CD8A	Activated.CD8.T.cell	Adaptive
CETN3	Activated.CD8.T.cell	Adaptive
CSE1L	Activated.CD8.T.cell	Adaptive
GEMIN6	Activated.CD8.T.cell	Adaptive
GNLY	Activated.CD8.T.cell	Adaptive
GPT2	Activated.CD8.T.cell	Adaptive
GZMA	Activated.CD8.T.cell	Adaptive
GZMH	Activated.CD8.T.cell	Adaptive
GZMK	Activated.CD8.T.cell	Adaptive
IL2RB	Activated.CD8.T.cell	Adaptive
LCK	Activated.CD8.T.cell	Adaptive
MPZL1	Activated.CD8.T.cell	Adaptive
NKG7	Activated.CD8.T.cell	Adaptive
PIK3IP1	Activated.CD8.T.cell	Adaptive
PTRH2	Activated.CD8.T.cell	Adaptive
TIMM13	Activated.CD8.T.cell	Adaptive
ZAP70	Activated.CD8.T.cell	Adaptive
ACP5	Gamma.delta.T.cell	Adaptive
AQP9	Gamma.delta.T.cell	Adaptive
BTN3A2	Gamma.delta.T.cell	Adaptive
C1orf54	Gamma.delta.T.cell	Adaptive
CARD8	Gamma.delta.T.cell	Adaptive
CCL18	Gamma.delta.T.cell	Adaptive
CD209	Gamma.delta.T.cell	Adaptive
CD33	Gamma.delta.T.cell	Adaptive
CD36	Gamma.delta.T.cell	Adaptive
CDK5	Gamma.delta.T.cell	Adaptive
IL10RB	Gamma.delta.T.cell	Adaptive
KLRF1	Gamma.delta.T.cell	Adaptive
LGALS1	Gamma.delta.T.cell	Adaptive
MAPK7	Gamma.delta.T.cell	Adaptive
KLHL7	Gamma.delta.T.cell	Adaptive
KRT80	Gamma.delta.T.cell	Adaptive
LAMC1	Gamma.delta.T.cell	Adaptive
LCORL	Gamma.delta.T.cell	Adaptive
LMNB1	Gamma.delta.T.cell	Adaptive
MEIS3P1	Gamma.delta.T.cell	Adaptive
MPL	Gamma.delta.T.cell	Adaptive
FABP1	Gamma.delta.T.cell	Adaptive
FABP5	Gamma.delta.T.cell	Adaptive
FADD	Gamma.delta.T.cell	Adaptive
MFAP3L	Gamma.delta.T.cell	Adaptive
MINPP1	Gamma.delta.T.cell	Adaptive
RPS24	Gamma.delta.T.cell	Adaptive
RPS7	Gamma.delta.T.cell	Adaptive
RPS9	Gamma.delta.T.cell	Adaptive
DBNL	Gamma.delta.T.cell	Adaptive
CCL13	Gamma.delta.T.cell	Adaptive
CD22	Immature..B.cell	Adaptive
CYBB	Immature..B.cell	Adaptive
FAM129C	Immature..B.cell	Adaptive
FCRL1	Immature..B.cell	Adaptive
FCRL3	Immature..B.cell	Adaptive
FCRL5	Immature..B.cell	Adaptive
FCRLA	Immature..B.cell	Adaptive
HDAC9	Immature..B.cell	Adaptive
HLA-DQA1	Immature..B.cell	Adaptive
HVCN1	Immature..B.cell	Adaptive
KIAA0226	Immature..B.cell	Adaptive
NCF1	Immature..B.cell	Adaptive
NCF1B	Immature..B.cell	Adaptive
P2RY10	Immature..B.cell	Adaptive
SP100	Immature..B.cell	Adaptive
TXNIP	Immature..B.cell	Adaptive
STAP1	Immature..B.cell	Adaptive
TAGAP	Immature..B.cell	Adaptive
ZCCHC2	Immature..B.cell	Adaptive
CCL3L1	Regulatory.T.cell	Adaptive
CD72	Regulatory.T.cell	Adaptive
CLEC5A	Regulatory.T.cell	Adaptive
FOXP3	Regulatory.T.cell	Adaptive
ITGA4	Regulatory.T.cell	Adaptive
L1CAM	Regulatory.T.cell	Adaptive
LIPA	Regulatory.T.cell	Adaptive
LRP1	Regulatory.T.cell	Adaptive
LRRC42	Regulatory.T.cell	Adaptive
MARCO	Regulatory.T.cell	Adaptive
MMP12	Regulatory.T.cell	Adaptive
MNDA	Regulatory.T.cell	Adaptive
MRC1	Regulatory.T.cell	Adaptive
MS4A6A	Regulatory.T.cell	Adaptive
PELO	Regulatory.T.cell	Adaptive
PLEK	Regulatory.T.cell	Adaptive
PRSS23	Regulatory.T.cell	Adaptive
PTGIR	Regulatory.T.cell	Adaptive
ST8SIA4	Regulatory.T.cell	Adaptive
STAB1	Regulatory.T.cell	Adaptive
B3GAT1	T.follicular.helper.cell	Adaptive
CDK5R1	T.follicular.helper.cell	Adaptive
PDCD1	T.follicular.helper.cell	Adaptive
BCL6	T.follicular.helper.cell	Adaptive
CD200	T.follicular.helper.cell	Adaptive
CD83	T.follicular.helper.cell	Adaptive
CD84	T.follicular.helper.cell	Adaptive
FGF2	T.follicular.helper.cell	Adaptive
GPR18	T.follicular.helper.cell	Adaptive
CEBPA	T.follicular.helper.cell	Adaptive
CECR1	T.follicular.helper.cell	Adaptive
CLEC10A	T.follicular.helper.cell	Adaptive
CLEC4A	T.follicular.helper.cell	Adaptive
CSF1R	T.follicular.helper.cell	Adaptive
CTSS	T.follicular.helper.cell	Adaptive
DMN	T.follicular.helper.cell	Adaptive
DPP4	T.follicular.helper.cell	Adaptive
LRRC32	T.follicular.helper.cell	Adaptive
MC5R	T.follicular.helper.cell	Adaptive
MICA	T.follicular.helper.cell	Adaptive
NCAM1	T.follicular.helper.cell	Adaptive
NCR2	T.follicular.helper.cell	Adaptive
NRP1	T.follicular.helper.cell	Adaptive
PDCD1LG2	T.follicular.helper.cell	Adaptive
PDCD6	T.follicular.helper.cell	Adaptive
PRDX1	T.follicular.helper.cell	Adaptive
RAE1	T.follicular.helper.cell	Adaptive
RAET1E	T.follicular.helper.cell	Adaptive
SIGLEC7	T.follicular.helper.cell	Adaptive
SIGLEC9	T.follicular.helper.cell	Adaptive
TYRO3	T.follicular.helper.cell	Adaptive
CHST12	T.follicular.helper.cell	Adaptive
CLIC3	T.follicular.helper.cell	Adaptive
IVNS1ABP	T.follicular.helper.cell	Adaptive
KIR2DL2	T.follicular.helper.cell	Adaptive
LGMN	T.follicular.helper.cell	Adaptive
CD70	Type.1.T.helper.cell	Adaptive
TBX21	Type.1.T.helper.cell	Adaptive
ADAM8	Type.1.T.helper.cell	Adaptive
AHCYL2	Type.1.T.helper.cell	Adaptive
ALCAM	Type.1.T.helper.cell	Adaptive
B3GALNT1	Type.1.T.helper.cell	Adaptive
BBS12	Type.1.T.helper.cell	Adaptive
BST1	Type.1.T.helper.cell	Adaptive
CD151	Type.1.T.helper.cell	Adaptive
CD47	Type.1.T.helper.cell	Adaptive
CD48	Type.1.T.helper.cell	Adaptive
CD52	Type.1.T.helper.cell	Adaptive
CD53	Type.1.T.helper.cell	Adaptive
CD59	Type.1.T.helper.cell	Adaptive
CD6	Type.1.T.helper.cell	Adaptive
CD68	Type.1.T.helper.cell	Adaptive
CD7	Type.1.T.helper.cell	Adaptive
CD96	Type.1.T.helper.cell	Adaptive
CFHR3	Type.1.T.helper.cell	Adaptive
CHRM3	Type.1.T.helper.cell	Adaptive
CLEC7A	Type.1.T.helper.cell	Adaptive
COL23A1	Type.1.T.helper.cell	Adaptive
COL4A4	Type.1.T.helper.cell	Adaptive
COL5A3	Type.1.T.helper.cell	Adaptive
DAB1	Type.1.T.helper.cell	Adaptive
DLEU7	Type.1.T.helper.cell	Adaptive
DOC2B	Type.1.T.helper.cell	Adaptive
EMP1	Type.1.T.helper.cell	Adaptive
F12	Type.1.T.helper.cell	Adaptive
FURIN	Type.1.T.helper.cell	Adaptive
GAB3	Type.1.T.helper.cell	Adaptive
GATM	Type.1.T.helper.cell	Adaptive
GFPT2	Type.1.T.helper.cell	Adaptive
GPR25	Type.1.T.helper.cell	Adaptive
GREM2	Type.1.T.helper.cell	Adaptive
HAVCR1	Type.1.T.helper.cell	Adaptive
HSD11B1	Type.1.T.helper.cell	Adaptive
HUNK	Type.1.T.helper.cell	Adaptive
IGF2	Type.1.T.helper.cell	Adaptive
RCSD1	Type.1.T.helper.cell	Adaptive
RYR1	Type.1.T.helper.cell	Adaptive
SAV1	Type.1.T.helper.cell	Adaptive
SELE	Type.1.T.helper.cell	Adaptive
SELP	Type.1.T.helper.cell	Adaptive
SH3KBP1	Type.1.T.helper.cell	Adaptive
SIT1	Type.1.T.helper.cell	Adaptive
SLC35B3	Type.1.T.helper.cell	Adaptive
SIGLEC10	Type.1.T.helper.cell	Adaptive
SKAP1	Type.1.T.helper.cell	Adaptive
THUMPD2	Type.1.T.helper.cell	Adaptive
TIGIT	Type.1.T.helper.cell	Adaptive
ZEB2	Type.1.T.helper.cell	Adaptive
ENC1	Type.1.T.helper.cell	Adaptive
FAM134B	Type.1.T.helper.cell	Adaptive
FBXO30	Type.1.T.helper.cell	Adaptive
FCGR2C	Type.1.T.helper.cell	Adaptive
STAC	Type.1.T.helper.cell	Adaptive
LTC4S	Type.1.T.helper.cell	Adaptive
MAN1B1	Type.1.T.helper.cell	Adaptive
MDH1	Type.1.T.helper.cell	Adaptive
MMD	Type.1.T.helper.cell	Adaptive
RGS16	Type.1.T.helper.cell	Adaptive
IL12A	Type.1.T.helper.cell	Adaptive
P2RX5	Type.1.T.helper.cell	Adaptive
CD97	Type.1.T.helper.cell	Adaptive
ITGB4	Type.1.T.helper.cell	Adaptive
ICAM3	Type.1.T.helper.cell	Adaptive
METRNL	Type.1.T.helper.cell	Adaptive
TNFRSF1A	Type.1.T.helper.cell	Adaptive
IRF1	Type.1.T.helper.cell	Adaptive
HTR2B	Type.1.T.helper.cell	Adaptive
CALD1	Type.1.T.helper.cell	Adaptive
MOCOS	Type.1.T.helper.cell	Adaptive
TRAF3IP2	Type.1.T.helper.cell	Adaptive
TLR8	Type.1.T.helper.cell	Adaptive
TRAF1	Type.1.T.helper.cell	Adaptive
DUSP14	Type.1.T.helper.cell	Adaptive
IL17A	Type.17.T.helper.cell	Adaptive
IL17RA	Type.17.T.helper.cell	Adaptive
C2CD4A	Type.17.T.helper.cell	Adaptive
C2CD4B	Type.17.T.helper.cell	Adaptive
CA2	Type.17.T.helper.cell	Adaptive
CCDC65	Type.17.T.helper.cell	Adaptive
CEACAM3	Type.17.T.helper.cell	Adaptive
IL17C	Type.17.T.helper.cell	Adaptive
IL17F	Type.17.T.helper.cell	Adaptive
IL17RC	Type.17.T.helper.cell	Adaptive
IL17RE	Type.17.T.helper.cell	Adaptive
IL23A	Type.17.T.helper.cell	Adaptive
ILDR1	Type.17.T.helper.cell	Adaptive
LONRF3	Type.17.T.helper.cell	Adaptive
SH2D6	Type.17.T.helper.cell	Adaptive
TNIP2	Type.17.T.helper.cell	Adaptive
ABCA1	Type.17.T.helper.cell	Adaptive
ABCB1	Type.17.T.helper.cell	Adaptive
ADAMTS12	Type.17.T.helper.cell	Adaptive
ANK1	Type.17.T.helper.cell	Adaptive
ANKRD22	Type.17.T.helper.cell	Adaptive
B3GALT2	Type.17.T.helper.cell	Adaptive
CAMTA1	Type.17.T.helper.cell	Adaptive
CCR9	Type.17.T.helper.cell	Adaptive
CD40	Type.17.T.helper.cell	Adaptive
GPR44	Type.17.T.helper.cell	Adaptive
IFT80	Type.17.T.helper.cell	Adaptive
ASB2	Type.2.T.helper.cell	Adaptive
CSRP2	Type.2.T.helper.cell	Adaptive
DAPK1	Type.2.T.helper.cell	Adaptive
DLC1	Type.2.T.helper.cell	Adaptive
DNAJC12	Type.2.T.helper.cell	Adaptive
DUSP6	Type.2.T.helper.cell	Adaptive
GNAI1	Type.2.T.helper.cell	Adaptive
LAMP3	Type.2.T.helper.cell	Adaptive
NRP2	Type.2.T.helper.cell	Adaptive
OSBPL1A	Type.2.T.helper.cell	Adaptive
PDE4B	Type.2.T.helper.cell	Adaptive
PHLDA1	Type.2.T.helper.cell	Adaptive
PLA2G4A	Type.2.T.helper.cell	Adaptive
RAB27B	Type.2.T.helper.cell	Adaptive
RBMS3	Type.2.T.helper.cell	Adaptive
RNF125	Type.2.T.helper.cell	Adaptive
TMPRSS3	Type.2.T.helper.cell	Adaptive
GATA3	Type.2.T.helper.cell	Adaptive
BIRC5	Type.2.T.helper.cell	Adaptive
CDC25C	Type.2.T.helper.cell	Adaptive
CDC7	Type.2.T.helper.cell	Adaptive
CENPF	Type.2.T.helper.cell	Adaptive
CXCR6	Type.2.T.helper.cell	Adaptive
DHFR	Type.2.T.helper.cell	Adaptive
EVI5	Type.2.T.helper.cell	Adaptive
GSTA4	Type.2.T.helper.cell	Adaptive
HELLS	Type.2.T.helper.cell	Adaptive
IL26	Type.2.T.helper.cell	Adaptive
LAIR2	Type.2.T.helper.cell	Adaptive
ABCD1	Activated.dendritic.cell	Innate
C1QC	Activated.dendritic.cell	Innate
CAPG	Activated.dendritic.cell	Innate
CCL3L3	Activated.dendritic.cell	Innate
CD207	Activated.dendritic.cell	Innate
CD302	Activated.dendritic.cell	Innate
ATP5B	Activated.dendritic.cell	Innate
ATP5L	Activated.dendritic.cell	Innate
ATP6V1A	Activated.dendritic.cell	Innate
BCL2L1	Activated.dendritic.cell	Innate
C1QB	Activated.dendritic.cell	Innate
SNURF	Activated.dendritic.cell	Innate
SPCS3	Activated.dendritic.cell	Innate
CCNA1	Activated.dendritic.cell	Innate
CEACAM8	Activated.dendritic.cell	Innate
NOS2	Activated.dendritic.cell	Innate
SRA1	Activated.dendritic.cell	Innate
TNFRSF6B	Activated.dendritic.cell	Innate
TREM1	Activated.dendritic.cell	Innate
TREML1	Activated.dendritic.cell	Innate
RHOA	Activated.dendritic.cell	Innate
SLC25A37	Activated.dendritic.cell	Innate
TNFSF14	Activated.dendritic.cell	Innate
TREML4	Activated.dendritic.cell	Innate
VNN2	Activated.dendritic.cell	Innate
XPO6	Activated.dendritic.cell	Innate
CLEC4C	Activated.dendritic.cell	Innate
TNFAIP2	Activated.dendritic.cell	Innate
UBD	Activated.dendritic.cell	Innate
ACTR3	Activated.dendritic.cell	Innate
RAB1A	Activated.dendritic.cell	Innate
SLA	Activated.dendritic.cell	Innate
HLA-DQA2	Activated.dendritic.cell	Innate
SIGLEC5	Activated.dendritic.cell	Innate
SLAMF9	Activated.dendritic.cell	Innate
ABAT	CD56bright.natural.killer.cell	Innate
C11orf75	CD56bright.natural.killer.cell	Innate
C5orf15	CD56bright.natural.killer.cell	Innate
CDHR1	CD56bright.natural.killer.cell	Innate
DCAF12	CD56bright.natural.killer.cell	Innate
DYNLL1	CD56bright.natural.killer.cell	Innate
GPR137B	CD56bright.natural.killer.cell	Innate
HCP5	CD56bright.natural.killer.cell	Innate
HDGFRP2	CD56bright.natural.killer.cell	Innate
KRT86	CD56bright.natural.killer.cell	Innate
MLST8	CD56bright.natural.killer.cell	Innate
ELMOD3	CD56bright.natural.killer.cell	Innate
ENTPD5	CD56bright.natural.killer.cell	Innate
FAM119A	CD56bright.natural.killer.cell	Innate
FAM179A	CD56bright.natural.killer.cell	Innate
CLIC2	CD56bright.natural.killer.cell	Innate
COX7A2L	CD56bright.natural.killer.cell	Innate
CREB3L4	CD56bright.natural.killer.cell	Innate
CSF1	CD56bright.natural.killer.cell	Innate
CSNK2A2	CD56bright.natural.killer.cell	Innate
CSTA	CD56bright.natural.killer.cell	Innate
CSTB	CD56bright.natural.killer.cell	Innate
CTPS	CD56bright.natural.killer.cell	Innate
CTSD	CD56bright.natural.killer.cell	Innate
FST	CD56bright.natural.killer.cell	Innate
GATA2	CD56bright.natural.killer.cell	Innate
GMPR	CD56bright.natural.killer.cell	Innate
HDC	CD56bright.natural.killer.cell	Innate
HEY1	CD56bright.natural.killer.cell	Innate
HOXA1	CD56bright.natural.killer.cell	Innate
HS2ST1	CD56bright.natural.killer.cell	Innate
HS3ST1	CD56bright.natural.killer.cell	Innate
BCL11B	CD56bright.natural.killer.cell	Innate
CDH3	CD56bright.natural.killer.cell	Innate
MYL6B	CD56bright.natural.killer.cell	Innate
NAA16	CD56bright.natural.killer.cell	Innate
ClQA	CD56bright.natural.killer.cell	Innate
ClQB	CD56bright.natural.killer.cell	Innate
CYP27B1	CD56bright.natural.killer.cell	Innate
EIF3M	CD56bright.natural.killer.cell	Innate
CYP27A1	CD56dim.natural.killer.cell	Innate
DDX55	CD56dim.natural.killer.cell	Innate
DYRK2	CD56dim.natural.killer.cell	Innate
RPL37A	CD56dim.natural.killer.cell	Innate
NOTCH3	CD56dim.natural.killer.cell	Innate
AKR7A3	CD56dim.natural.killer.cell	Innate
GPRC5C	CD56dim.natural.killer.cell	Innate
GRIN1	CD56dim.natural.killer.cell	Innate
HLA-E	CD56dim.natural.killer.cell	Innate
PORCN	CD56dim.natural.killer.cell	Innate
PSMC4	CD56dim.natural.killer.cell	Innate
UPP1	CD56dim.natural.killer.cell	Innate
IL21R	CD56dim.natural.killer.cell	Innate
KIR2DS1	CD56dim.natural.killer.cell	Innate
KIR2DS2	CD56dim.natural.killer.cell	Innate
KIR2DS5	CD56dim.natural.killer.cell	Innate
GIPR	Eosinophil	Innate
KRT18P50	Eosinophil	Innate
LRMP	Eosinophil	Innate
FOSB	Eosinophil	Innate
RRP12	Eosinophil	Innate
GPR183	Eosinophil	Innate
NR4A3	Eosinophil	Innate
ST3GAL6	Eosinophil	Innate
DEPDC5	Eosinophil	Innate
PDE6C	Eosinophil	Innate
PKD2L2	Eosinophil	Innate
GPR65	Eosinophil	Innate
IL5RA	Eosinophil	Innate
P2RY14	Eosinophil	Innate
DACH1	Eosinophil	Innate
DAPK2	Eosinophil	Innate
EMR3	Eosinophil	Innate
ACADM	Immature.dendritic.cell	Innate
AHCYL1	Immature.dendritic.cell	Innate
ALDH1A2	Immature.dendritic.cell	Innate
ALDH3A2	Immature.dendritic.cell	Innate
ALDH9A1	Immature.dendritic.cell	Innate
ALOX15	Immature.dendritic.cell	Innate
AMT	Immature.dendritic.cell	Innate
ARL1	Immature.dendritic.cell	Innate
ATIC	Immature.dendritic.cell	Innate
ATP5A1	Immature.dendritic.cell	Innate
CAPZA1	Immature.dendritic.cell	Innate
LILRA5	Immature.dendritic.cell	Innate
RDX	Immature.dendritic.cell	Innate
RRAGD	Immature.dendritic.cell	Innate
TACSTD2	Immature.dendritic.cell	Innate
INPP5F	Immature.dendritic.cell	Innate
RAB38	Immature.dendritic.cell	Innate
PLAU	Immature.dendritic.cell	Innate
CSF3R	Immature.dendritic.cell	Innate
SLC18A2	Immature.dendritic.cell	Innate
AMPD2	Immature.dendritic.cell	Innate
CLTB	Immature.dendritic.cell	Innate
C1orf162	Immature.dendritic.cell	Innate
AIF1	Macrophage	Innate
CCL1	Macrophage	Innate
CCL14	Macrophage	Innate
CCL23	Macrophage	Innate
CCL26	Macrophage	Innate
CD300LB	Macrophage	Innate
CNR1	Macrophage	Innate
CNR2	Macrophage	Innate
EIF1	Macrophage	Innate
EIF4A1	Macrophage	Innate
FPR1	Macrophage	Innate
FPR2	Macrophage	Innate
FRAT2	Macrophage	Innate
GPR27	Macrophage	Innate
GPR77	Macrophage	Innate
RNASE2	Macrophage	Innate
MS4A2	Macrophage	Innate
BASP1	Macrophage	Innate
IGSF6	Macrophage	Innate
HK3	Macrophage	Innate
VNN1	Macrophage	Innate
FES	Macrophage	Innate
NPL	Macrophage	Innate
FZD2	Macrophage	Innate
FAM198B	Macrophage	Innate
HNMT	Macrophage	Innate
SLC15A3	Macrophage	Innate
CD4	Macrophage	Innate
TXNDC3	Macrophage	Innate
FRMD4A	Macrophage	Innate
CRYBB1	Macrophage	Innate
HRH1	Macrophage	Innate
WNT5B	Macrophage	Innate
ADAMTS3	Mast.cell	Innate
CPA3	Mast.cell	Innate
CMA1	Mast.cell	Innate
CTSG	Mast.cell	Innate
ARHGAP15	Mast.cell	Innate
CPM	Mast.cell	Innate
FCN1	Mast.cell	Innate
FTL	Mast.cell	Innate
HSPA6	Mast.cell	Innate
ITGA9	Mast.cell	Innate
RNASE3	Mast.cell	Innate
S100A4	Mast.cell	Innate
SIGLEC8	Mast.cell	Innate
SLC6A4	Mast.cell	Innate
PTGS2	Mast.cell	Innate
EGR3	Mast.cell	Innate
PILRA	Mast.cell	Innate
CCR2	MDSC	Innate
CD14	MDSC	Innate
CD2	MDSC	Innate
CD86	MDSC	Innate
CXCR4	MDSC	Innate
FCGR2A	MDSC	Innate
FCGR2B	MDSC	Innate
FCGR3A	MDSC	Innate
FERMT3	MDSC	Innate
GPSM3	MDSC	Innate
IL18BP	MDSC	Innate
IL4R	MDSC	Innate
ITGAL	MDSC	Innate
ITGAM	MDSC	Innate
PARVG	MDSC	Innate
PSAP	MDSC	Innate
PTGER2	MDSC	Innate
PTGES2	MDSC	Innate
S100A8	MDSC	Innate
S100A9	MDSC	Innate
ASGR2	Monocyte	Innate
CFP	Monocyte	Innate
ASGR1	Monocyte	Innate
CD1D	Monocyte	Innate
UPK3A	Monocyte	Innate
ACTG1	Monocyte	Innate
ANXA5	Monocyte	Innate
ATP6V1B2	Monocyte	Innate
CFL1	Monocyte	Innate
DAZAP2	Monocyte	Innate
CTBS	Monocyte	Innate
EMR4P	Monocyte	Innate
HIVEP2	Monocyte	Innate
MARCKSL1	Monocyte	Innate
MBP	Monocyte	Innate
MMP15	Monocyte	Innate
PNPLA6	Monocyte	Innate
TMBIM6	Monocyte	Innate
PQBP1	Monocyte	Innate
TEX264	Monocyte	Innate
IKZF1	Monocyte	Innate
AKT3	Natural.killer.cell	Innate
AXL	Natural.killer.cell	Innate
BST2	Natural.killer.cell	Innate
CDH2	Natural.killer.cell	Innate
CRTAM	Natural.killer.cell	Innate
CSF2RA	Natural.killer.cell	Innate
CTSZ	Natural.killer.cell	Innate
CXCL1	Natural.killer.cell	Innate
CYTH1	Natural.killer.cell	Innate
DAXX	Natural.killer.cell	Innate
DGKH	Natural.killer.cell	Innate
DLL4	Natural.killer.cell	Innate
DPYD	Natural.killer.cell	Innate
ERBB3	Natural.killer.cell	Innate
F11R	Natural.killer.cell	Innate
FAM27A	Natural.killer.cell	Innate
FAM49A	Natural.killer.cell	Innate
FASLG	Natural.killer.cell	Innate
FCGR1A	Natural.killer.cell	Innate
FN1	Natural.killer.cell	Innate
FSTL1	Natural.killer.cell	Innate
FUCA1	Natural.killer.cell	Innate
GBP3	Natural.killer.cell	Innate
GLS2	Natural.killer.cell	Innate
GRB2	Natural.killer.cell	Innate
LST1	Natural.killer.cell	Innate
BCL2	Natural.killer.cell	Innate
CDC5L	Natural.killer.cell	Innate
FGF18	Natural.killer.cell	Innate
FUT5	Natural.killer.cell	Innate
FZR1	Natural.killer.cell	Innate
GAGE2	Natural.killer.cell	Innate
IGFBP5	Natural.killer.cell	Innate
KANK2	Natural.killer.cell	Innate
LDB3	Natural.killer.cell	Innate
BTN2A2	Natural.killer.T.cell	Innate
CD101	Natural.killer.T.cell	Innate
CD109	Natural.killer.T.cell	Innate
CNPY3	Natural.killer.T.cell	Innate
CNPY4	Natural.killer.T.cell	Innate
CREB1	Natural.killer.T.cell	Innate
CRTC2	Natural.killer.T.cell	Innate
CRTC3	Natural.killer.T.cell	Innate
CSF2	Natural.killer.T.cell	Innate
KLRC1	Natural.killer.T.cell	Innate
FUT4	Natural.killer.T.cell	Innate
ICAM2	Natural.killer.T.cell	Innate
IL32	Natural.killer.T.cell	Innate
LAMP2	Natural.killer.T.cell	Innate
LILRB5	Natural.killer.T.cell	Innate
KLRG1	Natural.killer.T.cell	Innate
HSPA4	Natural.killer.T.cell	Innate
HSPB6	Natural.killer.T.cell	Innate
ISM2	Natural.killer.T.cell	Innate
ITIH2	Natural.killer.T.cell	Innate
KDM4C	Natural.killer.T.cell	Innate
KIR2DS4	Natural.killer.T.cell	Innate
KIRREL3	Natural.killer.T.cell	Innate
SDCBP	Natural.killer.T.cell	Innate
NFATC2IP	Natural.killer.T.cell	Innate
MICB	Natural.killer.T.cell	Innate
KIR2DL1	Natural.killer.T.cell	Innate
KIR2DL3	Natural.killer.T.cell	Innate
KIR3DL1	Natural.killer.T.cell	Innate
KIR3DL2	Natural.killer.T.cell	Innate
NCR1	Natural.killer.T.cell	Innate
FOSL1	Natural.killer.T.cell	Innate
TSLP	Natural.killer.T.cell	Innate
SLC7A7	Natural.killer.T.cell	Innate
SPP1	Natural.killer.T.cell	Innate
TREM2	Natural.killer.T.cell	Innate
UBASH3A	Natural.killer.T.cell	Innate
YBX2	Natural.killer.T.cell	Innate
CCDC88A	Natural.killer.T.cell	Innate
CLEC1A	Natural.killer.T.cell	Innate
THBD	Natural.killer.T.cell	Innate
PDPN	Natural.killer.T.cell	Innate
VCAM1	Natural.killer.T.cell	Innate
EMR1	Natural.killer.T.cell	Innate
CREB5	Neutrophil	Innate
CDA	Neutrophil	Innate
CHST15	Neutrophil	Innate
S100A12	Neutrophil	Innate
APOBEC3A	Neutrophil	Innate
CASP5	Neutrophil	Innate
MMP25	Neutrophil	Innate
HAL	Neutrophil	Innate
C1orf183	Neutrophil	Innate
FFAR2	Neutrophil	Innate
MAK	Neutrophil	Innate
CXCR1	Neutrophil	Innate
STEAP4	Neutrophil	Innate
MGAM	Neutrophil	Innate
BTNL8	Neutrophil	Innate
CXCR2	Neutrophil	Innate
TNFRSF10C	Neutrophil	Innate
VNN3	Neutrophil	Innate
CBX6	Plasmacytoid.dendritic.cell	Innate
DAB2	Plasmacytoid.dendritic.cell	Innate
DDX17	Plasmacytoid.dendritic.cell	Innate
HIGD1A	Plasmacytoid.dendritic.cell	Innate
IDH3A	Plasmacytoid.dendritic.cell	Innate
IL3RA	Plasmacytoid.dendritic.cell	Innate
MAGED1	Plasmacytoid.dendritic.cell	Innate
NUCB2	Plasmacytoid.dendritic.cell	Innate
OFD1	Plasmacytoid.dendritic.cell	Innate
OGT	Plasmacytoid.dendritic.cell	Innate
PDIA4	Plasmacytoid.dendritic.cell	Innate
SERTAD2	Plasmacytoid.dendritic.cell	Innate
SIRPA	Plasmacytoid.dendritic.cell	Innate
TMED2	Plasmacytoid.dendritic.cell	Innate
ENG	Plasmacytoid.dendritic.cell	Innate
FCAR	Plasmacytoid.dendritic.cell	Innate
IGF1	Plasmacytoid.dendritic.cell	Innate
ITGA2B	Plasmacytoid.dendritic.cell	Innate
GABARAP	Plasmacytoid.dendritic.cell	Innate
GPX1	Plasmacytoid.dendritic.cell	Innate
KRT23	Plasmacytoid.dendritic.cell	Innate
PROK2	Plasmacytoid.dendritic.cell	Innate
RALB	Plasmacytoid.dendritic.cell	Innate
RETNLB	Plasmacytoid.dendritic.cell	Innate
RNF141	Plasmacytoid.dendritic.cell	Innate
SEC14L1	Plasmacytoid.dendritic.cell	Innate
SEPX1	Plasmacytoid.dendritic.cell	Innate
EMP3	Plasmacytoid.dendritic.cell	Innate
CD300LF	Plasmacytoid.dendritic.cell	Innate
ABTB1	Plasmacytoid.dendritic.cell	Innate
KLHL21	Plasmacytoid.dendritic.cell	Innate
PHRF1	Plasmacytoid.dendritic.cell	Innate

## Sheet: S5
Table-S5: The gene sets used in our work for marking each immune signature
aDCs	APC co inhibition	APC co stimulation	B cells	CCR	CD8+ T cells	Check-point	Cytolytic activity	DCs	HLA	iDCs	Inflammation-promoting	Macrophages	Mast cells	MHC class I	Neutrophils	NK cells	Parainflammation	pDCs	T cell co-inhibition	T cell co-stimulation	T helper cells	Tfh	Th1 cells	Th2 cells	TIL	Treg	Type I IFN Reponse	Type II IFN Reponse
CD83	C10orf54	CD40	BACH2	CCL16	CD8A	IDO1	PRF1	CCL17	HLA-E	CD1A	CCL5	C11orf45	CMA1	B2M	EVI2B	KLRC1	CXCL10	CLEC4C	BTLA	CD2	CD4	PDCD1	IFNG	PMCH	ITM2C	IL12RB2	DDX4	GPR146
LAMP3	CD274	CD58	BANK1	TPO		LAG3	GZMA	CCL22	HLA-DPB2	CD1E	CD19	CD68	MS4A2	HLA-A	HSD17B11	KLRF1	PLAT	CXCR3	C10orf54	CD226		CXCL13	TBX21	LAIR2	CD38	TMPRSS6	IFIT1	SELP
CCL1	LGALS9	CD70	BLK	TGFBR2		CTLA4		CD209	HLA-C		CD8B	CLEC5A	TPSAB1	TAP1	KDM6B		CCND1	GZMB	CD160	CD27		CXCR5	CTLA4	SMAD2	THEMIS2	CTSC	IFIT2	AHR
	PDCD1LG2	ICOSLG	BTLA	CXCL2		TNFRSF9		CCL13	HLA-J		CXCL10	CYBB			MEGF9		LGMN	IL3RA	CD244	CD28			STAT4	CXCR6	GLYR1	LAPTM4B	IFIT3
	PVRL3	SLAMF1	CD79A	CCL14		ICOS			HLA-DQB1		CXCL13	FUCA1			MNDA		PLAUR	IRF7	CD274	CD40LG			CD38	GATA3	ICOS	TFRC	IRF7
		TNFSF14	CD79B	TGFBR3		CD80			HLA-DQB2		CXCL9	GPNMB			NLRP12		AIM2	IRF8	CTLA4	ICOS			IL12RB2	IL26	F5	RNF145	ISG20
		TNFSF15	FCRL1	IL11RA		PDCD1LG2			HLA-DQA2		GNLY	HS3ST2			PADI4		MMP7	LILRA4	HAVCR2	SLAMF1			LTA		TIGIT	NETO2	MX1
		TNFSF18	FCRL3	CCL11		TIGIT			HLA-DQA1		GZMB	LGMN			SELL		ICAM1	PHEX	LAG3	TNFRSF18			CSF2		KLRD1	ADAT2	MX2
		TNFSF4	HVCN1	IL4I1		CD70			HLA-A		IFNG	MMP9			TRANK1		MX2	PLD4	LAIR1	TNFRSF25					IRF4	CHST2	RSAD2
		TNFSF8	RALGPS2	IL33		TNFSF9			HLA-DMA		IL12A	TM4SF19			VNN3		CXCL9	PTCRA	TIGIT	TNFRSF4					PRKCQ	CTLA4	TNFSF10
		TNFSF9		CXCL12		ICOSLG			HLA-DOB		IL12B						ANXA1			TNFRSF8					FCRL5	NFE2L3
				CXCL10		KIR3DL1			HLA-DRB1		IRF1						TLR2			TNFRSF9					SIRPG	LIMA1
				BMPER		CD86			HLA-H		PRF1						PLA2G2D			TNFSF14					LPXN	IL1R2
				BMP8A		PDCD1			HLA-B		STAT1						ITGA2								IL2RG	ICOS
				CXCL11		LAIR1			HLA-DRB5		TBX21						MX1								CCL5	HSDL2
				IL21R		TNFRSF8			HLA-DOA								HMOX1								LCK	HTATIP2
				IL17B		TNFSF15			HLA-DPB1								CD276								TRAF3IP3	FKBP1A
				TNFRSF9		TNFRSF14			HLA-DRA								TIRAP								CD86	TIGIT
				ILF2		IDO2			HLA-DRB6								IL33								MAL	CCR8
				CX3CR1		CD276			HLA-L								PTGES								LILRB1	LTA
				CCR8		CD40			HLA-F								TNFRSF12A								DOK2	SLC35F2
				TNFSF12		TNFRSF4			HLA-G								SCARB1								CD6	IL21R
				CSF3		TNFSF14			HLA-DMB								CD14								PAG1	AHCYL1
				TNFSF4		HHLA2			HLA-DPA1								BLNK								LAX1	SOCS2
				BMP3		CD244											IFIT3								PLEK	ETV7
				CX3CL1		CD274											RETNLB								PIK3CD	BCL2L1
				BMP5		HAVCR2											IFIT2								SLAMF1	RRAGB
				CXCR2		CD27											ISG15								XCL1	ACSL4
				TNFRSF10D		BTLA											OAS2								GPR171	CHRNA6
				BMP2		LGALS9											REL								XCL2	BATF
				CXCL14		TMIGD2											OAS3								TBX21	LAX1
				CCL28		CD28											CD44								CD2	ADPRH
				CXCL3		CD48											PPARG								CD53	TNFRSF4
				BMP6		TNFRSF25											BST2								KLHL6	ANKRD10
				CCL21		CD40LG											OAS1								SLAMF6	CD274
				CXCL9		ADORA2A											NOX1								CD40	CASP1
				CCL23		VTCN1											PLA2G2A								SIT1	LY75
				IL6		CD160											IFIT1								TNFRSF4	NPTN
				TNFRSF18		CD44											IFITM3								CD79A	SSTR3
				IL17RD		TNFSF18											IL1RN								CD247	GRSF1
				IL17D		TNFRSF18																			LCP2	CSF2RB
				IL27		BTNL2																			CD3D	TMEM184C
				CCL7		C10orf54																			CD27	NDFIP2
				IL1R1		CD200R1																			SH2D1A	ZBTB38
				CXCR4		TNFSF4																			FYB	ERI1
				CXCR2P1		CD200																			ARHGAP30	TRAF3
				TGFB1I1		NRP1																			ACAP1	NAB1
				IFNGR1																					CST7	HS3ST3B1
				IL9R																					CD3G	LAYN
				IL1RAPL1																					IL2RB	JAK1
				IL11																					CD3E	VDR
				CSF1																					FCRL3	LEPROT
				IL20RA																					CORO1A	GCNT1
				IL25																					ITK	PTPRJ
				TNFRSF4																					TCL1A	IKZF2
				IL18																					CYBB	CSF1
				ILF3																					CSF2RB	ENTPD1
				CCL20																					IKZF1	TNFRSF18
				TNFRSF12A																					NCF4	METTL7A
				IL6ST																					DOCK2	KSR1
				CXCL13																					CCR2	SSH1
				IL12B																					PTPRC	CADM1
				TNFRSF8																					PLAC8	IL1R1
				IL6R																					NCKAP1L	ACP5
				BMPR2																					IL7R	CHST7
				IFNE																					2021-09-06	THADA
				IL1RAPL2																					CD28	CD177
				IL3RA																					STAT4	NFAT5
				BMP4																					CD8A	ZNF282
				CCL24																					LY9	MAGEH1
				TNFSF13B																					CD48
				CCR4																					HCST
				IL2RA																					PTPRCAP
				IL32																					SASH3
				TNFRSF10C																					ARHGAP25
				IL22RA1																					LAT
				BMPR1A																					TRAT1
				CXCR5																					IL10RA
				CXCR3																					PAX5
				IFNA8																					CCR7
				IL17REL																					DOCK11
				IFNB1																					PARVG
				IFNAR1																					SPNS1
				TNFRSF1B																					CD52
				CCL17																					HCLS1
				IFNL1																					ARHGAP9
				IL16																					GIMAP6
				IL1RL1																					PRKCB
				ILK																					MS4A1
				CCL25																					GPR18
				ILDR2																					TBC1D10C
				CXCR1																					GVINP1
				IL36RN																					P2RY8
				IL34																					EVI2B
				TGFB1																					VAMP5
				IFNG																					KLRK1
				IL19																					SELL
				ILKAP																					MPEG1
				BMP2K																					MS4A6A
				CCR10																					ARHGAP15
				ILDR1																					MFNG
				EPO																					GZMK
				CCR7																					SELPLG
				IL17C																					TARP
				IL23A																					GIMAP7
				CCR5																					FAM65B
				IL7																					INPP5D
				EPOR																					ITGA4
				CCL13																					MZB1
				IL2RG																					GPSM3
				IL31RA																					STK10
				TNFAIP6																					CLEC2D
				IFNL2																					IL16
				BMP1																					NLRC3
				IL12RB1																					GIMAP5
				TNFAIP8																					GIMAP4
				IL4R																					IFFO1
				TNFRSF6B																					CFH
				TNFAIP8L1																					PVRIG
				TNFRSF10B																					CFHR1
				IFNL3
				CCL5
				CXCL6
				CXCL1
				CCR3
				TNFSF11
				CSF1R
				IL21
				IL1RAP
				IL12RB2
				CCL1
				IL17RA
				CCR1
				IL1RN
				TNFRSF11B
				TNFRSF14
				IL13
				IL2RB
				BMP8B
				CCL2
				IL24
				IL18RAP
				TGFBI
				TNFSF10
				TNFRSF11A
				CXCL5
				IL5RA
				TNFSF9
				IL1RL2
				TNFRSF13C
				IL36G
				IL15RA
				TNFRSF21
				CXCL8
				IL22RA2
				TNFAIP8L2
				IL18R1
				IFNLR1
				CXCR6
				CCL3L3
				TNFRSF1A
				IL17RE
				IFNGR2
				IL17RC
				TNFAIP8L3
				ILVBL
				TGFBRAP1
				CCL4L1
				CSF2RA
				CCRN4L
				CCL26
				TNFAIP1
				CCRL2
				IFNA10
				TNFRSF17
				IFNA13
				IL20
				IL18BP
				CCL3L1
				TNFSF12-TNFSF13
				IL5
				IL23R
				IL26
				TNF
				TGFA
				CSF2
				IL1F10
				CXCL17
				TNFSF13
				IFNA4
				IL37
				IL12A
				IL7R
				IFNA1
				IL1A
				IL4
				IL2
				CCL22
				CSF3R
				IL10
				IFNK
				TGFB2
				IL1R2
				IL1B
				IL17F
				IL27RA
				IL15
				TNFSF8
				IL36B
				XCL1
				CXCL16
				TNFRSF19
				IL3
				CCL3
				IFNA2
				BMPR1B
				IFNA21
				TNFSF18
				CCL8
				IL17RB
				TNFRSF25
				IL22
				IL10RB
				IFNAR2
				CCL18
				IFNA16
				CSF2RB
				IL36A
				TNFAIP3
				IL13RA2
				IL13RA1
				CCR9
				TNFRSF10A
				IFNA7
				IFNW1
				XCL2
				TNFSF14
				CCR2
				BMP15
				BMP10
				CCL15-CCL14
				TGFBR1
				IFNA5
				BMP7
				IFNA14
				IL20RB
				IL10RA
				IFNA17
				CCR6
				TGFB3
				CCL15
				CCL4
				CCL27
				TNFRSF13B
				TNFAIP2
				IL31
				IL17A
				TNFSF15
				CCL19
				IFNA6
				IL9
